# Supplementary material for: Rapid-CNS2: rapid comprehensive adaptive nanopore-sequencing of CNS tumors, a proof-of-concept study
Source: PubMed Central journal article supplement (PMC9038836; doi:10.1007/s00401-022-02415-6), 2022-03-31
Supplement: 401_2022_2415_MOESM1_ESM.pdf [file 401_2022_2415_MOESM1_ESM.pdf]

## **Rapid-CNS<sup>2</sup>: Rapid comprehensive adaptive nanopore-sequencing of CNS tumors, a proof-of-concept study**

Areeba Patel<sup>1,2\*</sup>, Helin Dogan<sup>1,2\*</sup>, Alexander Payne<sup>3</sup>, Elena Krause<sup>1</sup>, Philipp Sievers<sup>1,2</sup>, Natalie Schoebe<sup>1,2</sup>, Daniel Schimpf<sup>1,2</sup>, Christina Blume<sup>1,2</sup>, Damian Stichel<sup>1,2</sup>, Nadine Holmes<sup>3</sup>, Philipp Euskirchen<sup>4</sup>, Jürgen Hench<sup>5</sup>, Stephan Frank<sup>5</sup>, Violaine Rosenstiel-Goidts<sup>6</sup>, Miriam Ratliff<sup>7</sup>, Nima Etmian<sup>7</sup>, Andreas Unterberg<sup>8</sup>, Christoph Dieterich<sup>9</sup>, Christel Herold-Mende<sup>8</sup>, Stefan M Pfister<sup>10,11,12</sup>, Wolfgang Wick<sup>14</sup>, Matthew Loose<sup>3</sup>, Andreas von Deimling<sup>1,2</sup>, Martin Sill<sup>10,11\*</sup>, David TW Jones<sup>10,13\*</sup>, Matthias Schlesner<sup>15\*</sup>, Felix Sahm<sup>1,2,10\*</sup>

<sup>1</sup>Dept. of Neuropathology, University Hospital Heidelberg, Heidelberg, Germany.

<sup>2</sup>Clinical Cooperation Unit Neuropathology, German Cancer Consortium (DKTK), German Cancer Research Center, Heidelberg, Germany.

<sup>3</sup>DeepSeq, School of Life Sciences, University of Nottingham, Nottingham, United Kingdom.

<sup>4</sup> Department of Neurology, Charité-Universitätsmedizin Berlin, Berlin, Germany.

<sup>5</sup> Division of Neuropathology, Institute of Pathology, University Hospital Basel, Basel, Switzerland.

<sup>6</sup>Brain Tumor Translational Targets, German Cancer Research Center (DKFZ), Heidelberg, Germany.

<sup>7</sup>Dept. of Neurosurgery, University Hospital Mannheim, Mannheim, Germany.

<sup>8</sup>Dept. of Neurosurgery, University Hospital Heidelberg, Heidelberg, Germany.

<sup>9</sup>Department of Cardiology, Angiology, and Pneumology, University Hospital Heidelberg, University of Heidelberg, Heidelberg, Germany.

<sup>10</sup>Hopp Children's Cancer Center (KITZ), Heidelberg, Germany.

<sup>11</sup>Division of Pediatric Neurooncology, German Cancer Research Center (DKFZ) and German Cancer Consortium (DKTK), Heidelberg, Germany

<sup>12</sup>Department of Pediatric Hematology and Oncology, Heidelberg University Hospital, Heidelberg, Germany

<sup>13</sup>Pediatric Glioma Research Group, German Cancer Research Center (DKFZ), Heidelberg, Germany

<sup>14</sup>Clinical Cooperation Unit Neurooncology, German Consortium for Translational Cancer Research (DKTK), German Cancer Research Center (DKFZ), Heidelberg, Germany and Department of Neurology and Neurooncology Program, National Center for Tumor Diseases, Heidelberg University Hospital, Heidelberg, Germany

<sup>15</sup>Biomedical Informatics, Data Mining and Data Analytics, Augsburg University, Augsburg, Germany

Corresponding author

Felix Sahm, MD, PhD

Department of Neuropathology

University Hospital Heidelberg

and

Clinical Cooperation Unit Neuropathology (B300)

German Cancer Research Center (DKFZ)

Im Neuenheimer Feld 224

69120 Heidelberg, Germany

Fon: +49-6221 56-37886

[felix.sahm@med.uni-heidelberg.de](mailto:felix.sahm@med.uni-heidelberg.de)

## Supplementary Methods:

### Samples

We sequenced 47 cryopreserved samples (45 archival, 2 prospective) targeting Rapid\_CNS\_A (details on target below), and 12 samples (8 archival, 4 prospective) targeting Rapid\_CNS\_B from the Department of Neuropathology, University Hospital Heidelberg (Suppl. Fig. 1d). Two additional FFPE samples, PANEL\_A\_48 (run for 72h) and PANEL\_A\_49 (stopped running at 24h due to poor sequencing) were also sequenced. (See Suppl. Table 1 for detailed overview of samples).

### Library preparation:

Sections of 40x10 µm were prepared from cryoconserved tumor tissues with established molecular markers (IRB approval 2018-614N-MA, 005/2003) with tumor cell content (based on a H&E stain) > 60%. DNA was then extracted using the Promega Maxwell RSC Blood DNA Kit (catalogue # AS1400, Promega) on a Maxwell RSC 48 instrument (AS8500, Promega) per manufacturer's instructions. DNA concentrations were measured on a microplate reader (FLUOStar Omega, BMG Labtech) using the Invitrogen Qubit DNA BR Assay Kit (Q32851, Thermo Fisher Scientific). Next, the DNA was sheared to approximately 9 to 11 kb in a total volume of 50 µl using g-TUBEs (Covaris) at 7200 rpm for 120 sec. The fragment length was assessed on an Agilent 2100 Bioanalyzer (catalogue # G2939A, Agilent Technologies) with the Agilent DNA 12000 Kit (catalogue # 5067-1508, Agilent Technologies). Sequencing libraries were prepared with the SQK-LSK109 Ligation Sequencing Kit with the following modifications: 48 µl of the sheared DNA (2-2.5 µg) were taken into the end-prep reaction, leaving out the control DNA. The end-prep reaction was changed to an incubation for 30min at 20°C followed by 30min at 65°C followed by a cool down to 4°C in a thermal cycler. The clean-up was performed using AMPure XP beads and 80% ethanol, elution time was changed to 5min. Adapter ligation was extended to an incubation for 60min at room temperature. The ligation mix was then incubated with AMPure XP beads at 0.4x for 10min, clean-up was performed using the Long Fragment Buffer (LFB) and the final library was eluted in a total volume of 31 µl. Library concentrations were measured using the Invitrogen Qubit DNA HS Assay Kit (Q32851, Thermo Fisher Scientific) on a benchtop Quantus fluorometer (Promega). The libraries were loaded (500-600 ng) onto FLO-MIN106 R9.4.1 flow cells with a minimum of 1100 pores available according to the FC Check prior to loading. The flow cells were flushed after around 24 hours for a total of two times per sample with the Flow Cell Wash Kit (EXP-WSH003) per manufacturer's instructions. Sequencing was carried out on a MinION 1B and GridION (Oxford Nanopore Technologies). Three FFPE libraries were prepared, of which DNA for PANEL\_A\_48 and PANEL\_A\_49\_1 was extracted using the Promega Maxwell RSC Blood DNA Kit and for PANEL\_A\_49\_2 using the QIAamp FFPE Tissue kit.

### Adaptive sampling

47 samples (PANEL\_A\_01-PANEL\_A\_47) were sequenced on the MinION using ReadFish-enabled targeting on an 8 GB NVIDIA RTX 2080 Ti powered consumer notebook [10]. The targets (Rapid\_CNS\_A) included regions from the previously published neuropathology panel [12] and CpG sites instrumental in classification by the Heidelberg methylation classifier [6] (available on GitHub

<https://github.com/areebapatel/Rapid-CNS2>). A 10kb flank was added to the sites on either side to ensure optimal targeting by ReadFish (155 Mb). Guppy 4.2.2's fast basecalling (config dna\_r9.4.1\_450bps\_fast) mode was used to run ReadFish. 12 samples were sequenced using a shorter panel (Rapid\_CNS\_B: neuropathology gene panel flanked by 10 kb on either side, total 15 Mb) with MinKNOW's in-built adaptive sampling protocol on the GridION. Three samples were sequenced in one run on the GridION. Live basecalling was turned off for all runs.

#### Variant and copy-number calling

Samples were analyzed using a custom bioinformatics pipeline (areebapatel/Rapid-CNS2.git). FAST5 files were basecalled using ONT's proprietary software guppy 4.4.1 using the high accuracy configuration. All reads with Q-score >5 were used for analysis. QC and coverage analyses were performed by pycoQC and mosdepth respectively [7, 11]. Adapter trimming by Porechop was followed by minimap2 v2.18 alignment to the hg19 genome, samtools sorting and indexing [8, 9, 17]. SNVs were called using longshot v0.4.1 and PEPPER-Margin-DeepVariant r0.4 [4, 13]. TERT promoter mutations were further validated by mpileup and bcftools. Variant annotation was performed by ANNOVAR [16]. Filtering for clinical relevance was based on the 1000 Genomes (Aug 2015) frequencies and COSMIC 68 database [1, 15]. Copy number plots (100kb bin size) and gene-level copy number files (1kb, 10kb bin sizes) were generated using CNVpytor and a custom script [14].

#### Methylation-based classification

Methylation calls were made using megalodon v2.3.3 with a guppy v5.0.11 backend [19].

To classify nanopore sequencing derived DNA-methylation profiles of central nervous system tumors, an adapted ad-hoc random forest classifier based on nanoDx was established [5, 6]. It was trained on the publicly available 450k methylation array reference data set of the Heidelberg methylation classifier version 11 (GSE90496) [3]. This data set was preprocessed as described in [3]. For each Nanopore sample, methylation calls overlapping the top 100,000 probes (by mean decrease in accuracy) derived from the Heidelberg methylation classifier were selected. These probes were variance filtered to select the top 10,000 most variable probes. A random forest model with 20,000 trees was trained using ranger [18]. Recalibration was performed by training one vs all generalized linear models for each class. These models were used to obtain a prediction and confidence score for the sample. Ground truth for archival samples was inferred from EPIC array data (from FFPE samples) using the Heidelberg methylation classifier v11b4 predictions.

Methylation families were inferred by aggregating over methylation subclasses from the reference set.

#### MGMT promoter methylation

Ground truth for MGMT promoter methylation status was inferred from EPIC array analysis and pyrosequencing (6 prospective diagnostic samples). A total of 59 samples (47 Rapid\_CNS\_A and 12 Rapid\_CNS\_B samples) were split into 70% training and 30% validation data. In the training data, each of the 212 CpG sites in the MGMT promoter region were subjected to a Student's t-test

to compute the predictive value. 137 sites with p-value <0.01 were selected. The average over these sites was used to train a logistic regression based binomial classifier. The classifier was tested on the validation samples.

#### Shorter sequencing time and flowcell reuse

Five Rapid\_CNS\_B libraries (PANEL\_B\_01, 02, 03, 05, 06) were split based on reads generated in the first 24h (before flushing and reloading) and those generated in the next 48h (after flushing and reloading). These 10 sub-libraries were independently analyzed using the aforementioned pipeline. Since flushing and reloading could also enable loading a new sample, we used this analysis to assess potential for flowcell reuse.

### Supplementary results and discussion

#### Analysis pipeline

The Rapid-CNS<sup>2</sup> pipeline is available as a git repository (<https://github.com/areebapatel/Rapid-CNS2>). It requires a folder containing FAST5 files or a basecalled FASTQ file as input and generates SNV calls, CNV calls, MGMT promoter status and methylation classification as output (Suppl Fig 7). It can be run on an HPC cluster or a GPU workstation. Basecalling followed by SNV and CNV detection completes within 8 hours (for longshot, 12 hours for PEPPER-Margin-DeepVariant) while methylation calling and classification requires 24 hours depending on amount of data generated. Live methylation calling has the potential to substantially reduce analysis time.

#### On target rate

Targeted regions showed considerably increased coverage as compared to other regions (Suppl Fig 1a). Within the 47 libraries sequenced using Rapid\_CNS\_A on the MinION, a clear increase in mean coverage over target regions is shown for all chromosomes (Suppl Fig 1b). Owing to its smaller target size, the 12 libraries sequenced using Rapid\_CNS\_B displayed higher on-target coverage as compared to those with Rapid\_CNS\_A. Key genes like IDH1, TERT, BRAF, etc also mirrored the increase in median coverage (Suppl Fig 1c). This could also in part be attributed to the higher sequencing capacity of the GridION.

#### Mutational analysis

On re-evaluation of samples with discrepant mutations, it was found that Nanopore libraries (PANEL\_A\_01 and PANEL\_A\_25) were generated using DNA from frozen sections with infiltration zone and low tumor cell content, whereas the corresponding NGS data was derived from bulk tumor tissue. For PANEL\_A\_12, the *TERT*<sub>p</sub> mutation was present in the Nanopore data (detected by mpileup), but was filtered by PEPPER-Margin-DeepVariant and longshot. Owing to major differences in technology (short read NGS vs long read Nanopore-sequencing), variant calling tools (mpileup/Platypus for NGS vs DeepVariant/longshot for Nanopore sequencing) as well as tissue type (FFPE tissue for NGS vs cryoconserved tissue for Nanopore sequencing), we restricted our validation to pathognomonic alterations.

### Copy number analysis

Copy number plots obtained using the Rapid-CNS<sup>2</sup> pipeline demonstrated higher resolution and clear visualization of the copy number levels as compared to NGS panel sequencing (Suppl. Fig. 2 (left and centre)). Calculating depth of mapped reads, copy number variations detected were comparable to EPIC array results (Suppl. Fig. 2 (left and right)). Additionally, using smaller bin sizes (1kb, 10kb), genes covered by the copy number variations and their zygosity could also be accurately annotated. Resolution for copy number profiling was maintained across both panels (Rapid\_CNS\_A and Rapid\_CNS\_B) (Suppl Fig 2).

### Methylation analysis

Owing to non-uniform methylation calling, Bady's MGMT-STP27 method could not be used directly for MGMT promoter assessment [2]. Comparing average methylation over each site in methylated vs unmethylated samples revealed a number of sites had poor predictive value (Suppl. Fig. 3a). Averaging the methylation values over the 137 selected CpG sites showed a clear difference between methylated and unmethylated samples (Suppl. Fig. 3b). The test samples (yellow points) were in concordance with the thresholds proposed by the training data (25% cutoff). The logistic regression classifier trained on the training samples made accurate predictions in all testing samples (72 h runs) (Suppl Fig 3c).

Of the 10,000 probes selected for training in each sample, only ~1400 probes were common in all of the samples (Suppl Fig 3d). The out-of-the bag error for ad-hoc classifiers for each sample was between 0.18-0.20 (Suppl Fig 3e).

Data obtained from a 72h run usually covered >300,000 probes from the 450K array. Loading the entirety of the overlapping probe set from the training set for re-training warranted considerable memory. Methylation classification in Rapid-CNS<sup>2</sup> infers CpG importance from the Heidelberg methylation classifier by selecting sites from the top 100K probes to re-train the ad-hoc classifier. This considerably reduced the time and memory required to perform methylation classification. On average, methylation classification (including I/O processes) took 10 minutes with 16 threads. Complete scores and comparison with EPIC array analysis are reported in the Suppl. Table 2.

### Diagnostic samples

Six prospective samples were run using Rapid-CNS<sup>2</sup>. As shown in the Suppl. Table 4, five of these were glioblastomas, while one was classified as an IDH mutant, 1p/19q codeleted oligodendroglioma. Histopathological diagnoses for all samples were confirmed by their Rapid-CNS<sup>2</sup> molecular profiling.

Rapid-CNS<sup>2</sup> also accurately profiled PANEL\_B\_08 as an ATRT-SHH tumor, which was reported as a glioma by histology (Suppl. Fig 4).

### Flowcell reuse and shorter sequencing times

Five libraries run using Rapid\_CNS\_B were split into two each, containing reads generated in the first 24h and those generated in the subsequent 48h after flushing and reloading respectively. Flushing the flowcell depletes all previously loaded sample. We considered data generated after

reloading the flowcell to be equivalent to loading a new library on a previously used flowcell. Since the same sample was loaded again, it avoided any sample or flowcell-related bias. From Suppl. Fig. 5a, each split library contained > 5 million reads. While there was no clear trend observed for the number of reads generated in the first 24h vs next 48h, mean on-target coverage for all libraries was similar to that observed with Rapid\_CNS\_A libraries sequenced for 72h (Suppl. Fig. 6c, 1a). As shown in Suppl. Fig. 6b and d, complete concordance was reported for all pathognomonic alterations (*IDH1*, *TERT*<sub>p</sub>, *MGMT* promoter methylation and copy number alterations). Methylation families were correctly identified in all split libraries, 4 of which also reported the accurate methylation sub-class as identified by the corresponding EPIC array-based classification (same as their corresponding 72h runs, Suppl. file). Copy number profiles were identical for the complete 72h run, first 24h run and next 48h run for all split libraries (Suppl. Fig. 6d). For a 24h run, sequencing with the shorter panel (Rapid\_CNS\_B) resulted in mean on-target coverage equivalent to a 72h run with the longer panel (Rapid\_CNS\_A). This demonstrated that sequencing time can be reduced proportionally by decreasing target sizes. As flowcell quality is maintained, subsequent flushing and reloading would enable effective reuse with multiple samples.

#### FFPE samples

Three libraries were run with two FFPE samples (PANEL\_A\_48 (72h), PANEL\_A\_49\_1 and PANEL\_A\_49\_2 (stopped running at 24h due to poor sequencing)) to assess feasibility of the approach. As evident from Suppl. Fig 7 all FFPE runs displayed very low read counts (140K -160K reads) as compared to a cryopreserved sample (~10M reads). Channel activity was also poor. While flushing after 24h intervals in PANEL\_A\_48 increased channel activity and read count, it did not generate sufficient data for analysis. This could be potentially due to low fragment lengths in FFPE samples. Thus, in its current state, Rapid-CNS<sup>2</sup> is restricted to use with cryopreserved or fresh CNS tumor samples. However, the potential for further advances in Nanopore technology cannot be underestimated, and FFPE sample processing may be feasible in the near future.

#### Costs involved:

Currently, a complete molecular diagnostic workup including NGS panel sequencing and EPIC array analysis costs about 410 EUR per sample. This seemingly lower cost is offset by the initial investment which could amount to > 300,000 EUR, and the need to have sufficient case numbers to efficiently run EPIC or NGS. In comparison, MinION costs about 1,000 EUR and the GridION (5 samples) costs about 50,000 EUR. For Rapid-CNS<sup>2</sup> runs, flowcell costs currently (potentially depending on market) start from 430 EUR per flowcell (96-pack) to 810 EUR (single flowcell). Library preparation and two flowcell washes then amount to 120 EUR. Thus, starting cost per sample for Rapid-CNS<sup>2</sup> adds up to 550 EUR (excluding electricity and other auxiliary costs). The flowcell cost is the limiting factor in the total assay costs. However, as a cost-efficient solution flowcells can be reused, reducing the total cost of Rapid-CNS<sup>2</sup> to 315 EUR per sample and thus making it competitive in comparison to conventional methods. Reducing panel size could facilitate multiple reuses of the flowcell, thus reducing costs even further.

## References:

1. Auton A, Abecasis GR, Altshuler DM, Durbin RM, Abecasis GR, Bentley DR, Chakravarti A, Clark AG, Donnelly P, Eichler EE, Flicek P, Gabriel SB, Gibbs RA, Green ED, Hurler ME, Knoppers BM, Korbel JO, Lander ES, Lee C, Lehrach H, Mardis ER, Marth GT, McVean GA, Nickerson DA, Schmidt JP, Sherry ST, Wang J, Wilson RK, Gibbs RA, Boerwinkle E, Doddapaneni H, Han Y, Korchina V, Kovar C, Lee S, Muzny D, Reid JG, Zhu Y, Wang J, Chang Y, Feng Q, Fang X, Guo X, Jian M, Jiang H, Jin X, Lan T, Li G, Li J, Li Y, Liu S, Liu X, Lu Y, Ma X, Tang M, Wang B, Wang G, Wu H, Wu R, Xu X, Yin Y, Zhang D, Zhang W, Zhao J, Zhao M, Zheng X, Lander ES, Altshuler DM, Gabriel SB, Gupta N, Gharani N, Toji LH, Gerry NP, Resch AM, Flicek P, Barker J, Clarke L, Gil L, Hunt SE, Kelman G, Kulesha E, Leinonen R, McLaren WM, Radhakrishnan R, Roa A, Smirnov D, Smith RE, Streeter I, Thormann A, Toneva I, Vaughan B, Zheng-Bradley X, Bentley DR, Grocock R, Humphray S, James T, Kingsbury Z, Lehrach H, Sudbrak R, Albrecht MW, Amstislavskiy VS, Borodina TA, Lienhard M, Mertes F, Sultan M, Timmermann B, Yaspo M-L, Mardis ER, Wilson RK, Fulton L, Fulton R, Sherry ST, Ananiev V, Belaia Z, Beloslyudtsev D, Bouk N, Chen C, Church D, Cohen R, Cook C, Garner J, Hefferon T, Kimelman M, Liu C, Lopez J, Meric P, O'Sullivan C, Ostapchuk Y, Phan L, Ponomarov S, Schneider V, Shekhtman E, Sirotkin K, Slotta D, Zhang H, McVean GA, Durbin RM, Balasubramaniam S, Burton J, Danecek P, Keane TM, Kolb-Kokocinski A, McCarthy S, Stalker J, Quail M, Schmidt JP, Davies CJ, Gollub J, Webster T, Wong B, Zhan Y, Auton A, Campbell CL, Kong Y, Marcketta A, Gibbs RA, Yu F, Antunes L, Bainbridge M, Muzny D, Sabo A, Huang Z, Wang J, Coin LJM, Fang L, Guo X, Jin X, Li G, Li Q, Li Y, Li Z, Lin H, Liu B, Luo R, Shao H, Xie Y, Ye C, Yu C, Zhang F, Zheng H, Zhu H, Alkan C, Dal E, Kahveci F, Marth GT, Garrison EP, Kural D, Lee W-P, Fung Leong W, Stromberg M, Ward AN, Wu J, Zhang M, Daly MJ, DePristo MA, Handsaker RE, Altshuler DM, Banks E, Bhatia G, del Angel G, Gabriel SB, Genovese G, Gupta N, Li H, Kashin S, Lander ES, McCarroll SA, Nemes J, Poplin RE, Yoon SC, Lihm J, Makarov V, Clark AG, Gottipati S, Keinan A, Rodriguez-Flores JL, Korbel JO, Rausch T, Fritz MH, Stütz AM, Flicek P, Beal K, Clarke L, Datta A, Herrero J, McLaren WM, Ritchie GRS, Smith RE, Zerbino D, Zheng-Bradley X, Sabeti PC, Shlyakhter I, Schaffner SF, Vitti J, Cooper DN, Ball E v, Stenson PD, Bentley DR, Barnes B, Bauer M, Keira Cheetham R, Cox A, Eberle M, Humphray S, Kahn S, Murray L, Peden J, Shaw R, Kenny EE, Batzer MA, Konkel MK, Walker JA, MacArthur DG, Lek M, Sudbrak R, Amstislavskiy VS, Herwig R, Mardis ER, Ding L, Koboldt DC, Larson D, Ye K, Gravel S, Consortium T 1000 GP, authors C, committee S, group P, Medicine BC of, BGI-Shenzhen, Harvard BI of MIT and, Research CI for M, European Molecular Biology Laboratory EBI, Illumina, Genetics MPI for M, University MGI at W, Health USNI of, Oxford U of, Institute WTS, group A, Affymetrix, Medicine AEC of, University B, College B, Laboratory CSH, University C, Laboratory EMB, University H, Database HGM, Sinai IS of M at M, University LS, Hospital MG, University M, National Eye Institute NIH (2015) A global reference for human genetic variation. *Nature* 526:68–74. doi: 10.1038/nature15393
2. Bady P, Sciuscio D, Diserens A-C, Bloch J, van den Bent MJ, Marosi C, Dietrich P-Y, Weller M, Mariani L, Heppner FL, McDonald DR, Lacombe D, Stupp R, Delorenzi M, Hegi ME (2012) MGMT methylation analysis of glioblastoma on the Infinium methylation BeadChip identifies two distinct CpG regions associated with gene silencing and outcome, yielding a prediction model for comparisons across datasets, tumor grades, and CIMP-status. *Acta neuropathologica* 124:547–560. doi: 10.1007/s00401-012-1016-2
3. Capper D, Jones DTW, Sill M, Hovestadt V, Schrimpf D, Sturm D, Koelsche C, Sahm F, Chavez L, Reuss DE, Kratz A, Wefers AK, Huang K, Pajtler KW, Schweizer L, Stichel D, Olar A, Engel NW, Lindenberg K, Harter PN, Braczynski AK, Plate KH, Dohmen H, Garvalov BK, Coras R, Hölsken A, Hewer E, Bewerunge-Hudler M, Schick M, Fischer R, Beschoner R, Schittenhelm J, Staszewski O, Wani K, Varlet P, Pages M, Temming P, Lohmann D, Selt F, Witt H, Milde T, Witt O, Aronica E, Giangaspero F, Rushing E, Scheurlen W, Geisenberger C, Rodriguez FJ, Becker A, Preusser M, Haberler C, Bjerkvig R, Cryan J, Farrell M, Deckert M, Hench J, Frank S, Serrano J, Kannan K, Tsirogos A, Brück W, Hofer S, Brehmer S, Seiz-Rosenhagen M, Hänggi D, Hans V, Rozsnoki S, Hansford JR, Kohlhof P, Kristensen BW, Lechner M, Lopes B, Mawrin C, Ketter R, Kulozik A, Khatib Z, Heppner F, Koch A, Jouvet A, Keohane C, Mühleisen H, Mueller W, Pohl U, Prinz M, Benner A, Zapatka M, Gottardo NG, Driever PH, Kramm CM, Müller HL, Rutkowski S, von Hoff K, Frühwald MC, Gnekow A, Fleischhack G, Tippelt S, Calaminus G, Monoranu C-M, Perry A, Jones C, Jacques TS, Radlwimmer B, Gessi M, Pietsch T, Schramm J, Schackert G, Westphal M, Reifenberger G, Wesseling P, Weller M, Collins VP, Blümcke I, Bendszus M, Debus J, Huang A, Jabado N, Northcott PA, Paulus W, Gajjar A, Robinson GW, Taylor MD, Jaunmuktane Z, Ryzhova M, Platten M, Unterberg A, Wick W, Karajannis MA, Mittelbronn M, Acker T, Hartmann C, Aldape K, Schüller U, Buslei R, Lichter P, Kool M, Herold-Mende C, Ellison

- DW, Hasselblatt M, Snuderl M, Brandner S, Korshunov A, von Deimling A, Pfister SM (2018) DNA methylation-based classification of central nervous system tumours. *Nature* 555:469–474. doi: 10.1038/nature26000
4. Edge P, Bansal V (2019) Longshot enables accurate variant calling in diploid genomes from single-molecule long read sequencing. *Nature Communications* 10:4660. doi: 10.1038/s41467-019-12493-y
  5. Euskirchen P, Bielle F, Labreche K, Kloosterman WP, Rosenberg S, Daniau M, Schmitt C, Masliah-Planchon J, Bourdeaut F, Dehais C, Marie Y, Delattre J-Y, Idbaih A (2017) Same-day genomic and epigenomic diagnosis of brain tumors using real-time nanopore sequencing. *Acta neuropathologica* 134:691–703. doi: 10.1007/s00401-017-1743-5
  6. Kuschel LP, Hench J, Frank S, Hench IB, Girard E, Blanluet M, Masliah-Planchon J, Misch M, Onken J, Czabanka M, Karau P, Ishaque N, Hain EG, Heppner F, Idbaih A, Behr N, Harms C, Capper D, Euskirchen P (2021) Robust methylation-based classification of brain tumors using nanopore sequencing. medRxiv 2021.03.06.21252627. doi: 10.1101/2021.03.06.21252627
  7. Leger A, Leonardi T (2019) pycoQC, interactive quality control for Oxford Nanopore Sequencing. *Journal of Open Source Software* 4:1236. doi: 10.21105/joss.01236
  8. Li H (2018) Minimap2: pairwise alignment for nucleotide sequences. *Bioinformatics* 34:3094–3100. doi: 10.1093/bioinformatics/bty191
  9. Li H, Handsaker B, Wysoker A, Fennell T, Ruan J, Homer N, Marth G, Abecasis G, Durbin R, 1000 Genome Project Data Processing Subgroup (2009) The Sequence Alignment/Map format and SAMtools. *Bioinformatics* 25:2078–2079. doi: 10.1093/bioinformatics/btp352
  10. Payne A, Holmes N, Clarke T, Munro R, Debebe BJ, Loose M (2021) Readfish enables targeted nanopore sequencing of gigabase-sized genomes. *Nature Biotechnology* 39:442–450. doi: 10.1038/s41587-020-00746-x
  11. Pedersen BS, Quinlan AR (2018) Mosdepth: quick coverage calculation for genomes and exomes. *Bioinformatics* 34:867–868. doi: 10.1093/bioinformatics/btx699
  12. Sahm F, Schrimpf D, Jones DTW, Meyer J, Kratz A, Reuss D, Capper D, Koelsche C, Korshunov A, Wiestler B, Buchhalter I, Milde T, Selt F, Sturm D, Kool M, Hummel M, Bewerunge-Hudler M, Mawrin C, Schüller U, Jungk C, Wick A, Witt O, Platten M, Herold-Mende C, Unterberg A, Pfister SM, Wick W, von Deimling A (2016) Next-generation sequencing in routine brain tumor diagnostics enables an integrated diagnosis and identifies actionable targets. *Acta Neuropathologica* 131:903–910. doi: 10.1007/s00401-015-1519-8
  13. Shafin K, Pesout T, Chang P-C, Nattestad M, Kolesnikov A, Goel S, Baid G, Eizenga JM, Miga KH, Carnevali P, Jain M, Carroll A, Paten B (2021) Haplotype-aware variant calling enables high accuracy in nanopore long-reads using deep neural networks. bioRxiv 2021.03.04.433952. doi: 10.1101/2021.03.04.433952
  14. Suvakov M, Panda A, Diesh C, Holmes I, Abyzov A (2021) CNVpytor: a tool for CNV/CNA detection and analysis from read depth and allele imbalance in whole genome sequencing. bioRxiv 2021.01.27.428472. doi: 10.1101/2021.01.27.428472
  15. Tate JG, Bamford S, Jubb HC, Sondka Z, Beare DM, Bindal N, Boutselakis H, Cole CG, Creatore C, Dawson E, Fish P, Harsha B, Hathaway C, Jupe SC, Kok CY, Noble K, Ponting L, Ramshaw CC, Rye CE, Speedy HE, Stefancsik R, Thompson SL, Wang S, Ward S, Campbell PJ, Forbes SA (2019) COSMIC: the Catalogue Of Somatic Mutations In Cancer. *Nucleic acids research* 47:D941–D947. doi: 10.1093/nar/gky1015
  16. Wang K, Li M, Hakonarson H (2010) ANNOVAR: functional annotation of genetic variants from high-throughput sequencing data. *Nucleic acids research* 38:e164. doi: 10.1093/nar/gkq603
  17. Wick RR, Judd LM, Gorrie CL, Holt KE (2017) Completing bacterial genome assemblies with multiplex MinION sequencing. *Microbial Genomics* 3. doi: 10.1099/mgen.0.000132
  18. Wright MN, Ziegler A (2017) **ranger**: A Fast Implementation of Random Forests for High Dimensional Data in C++ and R. *Journal of Statistical Software* 77. doi: 10.18637/jss.v077.i01
  19. nanoporetech/megalodon: Megalodon is a research command line tool to extract high accuracy modified base and sequence variant calls from raw nanopore reads by anchoring the information rich basecalling neural network output to a reference genome/transcriptome. <https://github.com/nanoporetech/megalodon>. Accessed 2 Dec 2020



| Library    | Platform | Panel       | Matching_conventional_data | In Fig 1                           | Histological diagnosis | Final type/subtype diagnosis      | Methylation classification |
|------------|----------|-------------|----------------------------|------------------------------------|------------------------|-----------------------------------|----------------------------|
| PANEL_A_01 | MinION   | Rapid_CNS_A | Yes                        | Yes                                | diffuse glioma         | Glioblastoma (IDH wildtype)       | GBM MES                    |
| PANEL_A_02 | MinION   | Rapid_CNS_A | Yes                        | Yes                                | diffuse glioma         | Glioblastoma (IDH wildtype)       | GBM RTK_II                 |
| PANEL_A_03 | MinION   | Rapid_CNS_A | Yes                        | Yes                                | diffuse glioma         | Glioblastoma (IDH wildtype)       | GBM RTK_II                 |
| PANEL_A_04 | MinION   | Rapid_CNS_A | Yes                        | Yes                                | diffuse glioma         | Glioblastoma (IDH wildtype)       | GBM RTK_II                 |
| PANEL_A_05 | MinION   | Rapid_CNS_A | Yes                        | Yes                                | diffuse glioma         | Glioblastoma (IDH wildtype)       | GBM RTK_II                 |
| PANEL_A_06 | MinION   | Rapid_CNS_A | Yes                        | Yes                                | diffuse glioma         | Glioblastoma (IDH wildtype)       | GBM RTK_II                 |
| PANEL_A_07 | MinION   | Rapid_CNS_A | Yes                        | Yes                                | diffuse glioma         | Glioblastoma (IDH wildtype)       | GBM RTK_II                 |
| PANEL_A_08 | MinION   | Rapid_CNS_A | Yes                        | Yes                                | diffuse glioma         | Glioblastoma (IDH wildtype)       | GBM RTK_II                 |
| PANEL_A_09 | MinION   | Rapid_CNS_A | Yes                        | Yes                                | diffuse glioma         | Glioblastoma (IDH wildtype)       | GBM RTK_II                 |
| PANEL_A_10 | MinION   | Rapid_CNS_A | Yes                        | Yes                                | diffuse glioma         | Glioblastoma (IDH wildtype)       | GBM RTK_II                 |
| PANEL_A_11 | MinION   | Rapid_CNS_A | Yes                        | Yes                                | diffuse glioma         | Glioblastoma (IDH wildtype)       | GBM RTK_I                  |
| PANEL_A_12 | MinION   | Rapid_CNS_A | Yes                        | Yes                                | diffuse glioma         | Glioblastoma (IDH wildtype)       | GBM RTK_II                 |
| PANEL_A_13 | MinION   | Rapid_CNS_A | Yes                        | Yes                                | diffuse glioma         | Glioblastoma (IDH wildtype)       | GBM RTK_II                 |
| PANEL_A_14 | MinION   | Rapid_CNS_A | Yes                        | Yes                                | diffuse glioma         | Glioblastoma (IDH wildtype)       | GBM RTK_II                 |
| PANEL_A_15 | MinION   | Rapid_CNS_A | Yes                        | Yes                                | diffuse glioma         | Glioblastoma (IDH wildtype)       | GBM RTK_II                 |
| PANEL_A_16 | MinION   | Rapid_CNS_A | Yes                        | Yes                                | diffuse glioma         | Astrocytoma (IDH mutant)          | A_IDH_HG                   |
| PANEL_A_17 | MinION   | Rapid_CNS_A | Yes                        | Yes                                | diffuse glioma         | Oligodendroglioma (IDH mutant)    | O_IDH                      |
| PANEL_A_18 | MinION   | Rapid_CNS_A | Yes                        | Yes                                | diffuse glioma         | Oligodendroglioma (IDH mutant)    | O_IDH                      |
| PANEL_A_19 | MinION   | Rapid_CNS_A | Yes                        | Yes                                | diffuse glioma         | Astrocytoma (IDH mutant)          | A_IDH_HG                   |
| PANEL_A_20 | MinION   | Rapid_CNS_A | Yes                        | Yes                                | diffuse glioma         | Astrocytoma (IDH mutant)          | A_IDH_HG                   |
| PANEL_A_21 | MinION   | Rapid_CNS_A | Yes                        | Yes                                | diffuse glioma         | Astrocytoma (IDH mutant)          | A_IDH                      |
| PANEL_A_22 | MinION   | Rapid_CNS_A | Yes                        | Yes                                | diffuse glioma         | Oligodendroglioma (IDH mutant)    | O_IDH                      |
| PANEL_A_23 | MinION   | Rapid_CNS_A | Yes                        | Yes                                | diffuse glioma         | Astrocytoma (IDH mutant)          | A_IDH_HG                   |
| PANEL_A_24 | MinION   | Rapid_CNS_A | Yes                        | Yes                                | diffuse glioma         | Astrocytoma (IDH mutant)          | A_IDH                      |
| PANEL_A_25 | MinION   | Rapid_CNS_A | Yes                        | Yes                                | diffuse glioma         | Astrocytoma                       | A_IDH                      |
| PANEL_A_26 | MinION   | Rapid_CNS_A | Yes                        | Yes                                | diffuse glioma         | Oligodendroglioma (IDH mutant)    | O_IDH                      |
| PANEL_A_27 | MinION   | Rapid_CNS_A | Yes                        | Yes                                | diffuse glioma         | Astrocytoma (IDH mutant)          | A_IDH_HG                   |
| PANEL_A_28 | MinION   | Rapid_CNS_A | Yes                        | Yes                                | diffuse glioma         | Glioblastoma (IDH wildtype)       | GBM RTK_II                 |
| PANEL_A_29 | MinION   | Rapid_CNS_A | Yes                        | Yes                                | diffuse glioma         | Glioblastoma (IDH wildtype)       | GBM RTK_II                 |
| PANEL_A_30 | MinION   | Rapid_CNS_A | Yes                        | Yes                                | diffuse glioma         | Glioblastoma (IDH wildtype)       | GBM RTK_II                 |
| PANEL_A_31 | MinION   | Rapid_CNS_A | Yes                        | Yes                                | diffuse glioma         | Oligodendroglioma (IDH mutant)    | O_IDH                      |
| PANEL_A_32 | MinION   | Rapid_CNS_A | Yes                        | Yes                                | diffuse glioma         | Glioblastoma (IDH wildtype)       | GBM RTK_II                 |
| PANEL_A_33 | MinION   | Rapid_CNS_A | Yes                        | Yes                                | diffuse glioma         | Glioblastoma (IDH wildtype)       | GBM RTK_II                 |
| PANEL_A_34 | MinION   | Rapid_CNS_A | Yes                        | Yes                                | diffuse glioma         | Glioblastoma (IDH wildtype)       | GBM RTK_II                 |
| PANEL_A_35 | MinION   | Rapid_CNS_A | Yes                        | Yes                                | diffuse glioma         | Glioblastoma (IDH wildtype)       | GBM RTK_II                 |
| PANEL_A_36 | MinION   | Rapid_CNS_A | Yes                        | Yes                                | diffuse glioma         | Glioblastoma (IDH wildtype)       | GBM RTK_II                 |
| PANEL_A_37 | MinION   | Rapid_CNS_A | Yes                        | Yes                                | low-grade glioma       | Pilocytic astrocytoma             | LGG_PA_PF                  |
| PANEL_A_38 | MinION   | Rapid_CNS_A | Yes                        | Yes                                | low-grade glioma       | Pilocytic astrocytoma             | LGG_PA_MID                 |
| PANEL_A_39 | MinION   | Rapid_CNS_A | Yes                        | Yes                                | low-grade glioma       | Pilocytic astrocytoma             | LGG_PA_PF                  |
| PANEL_A_40 | MinION   | Rapid_CNS_A | Yes                        | Yes                                | low-grade glioma       | Pilocytic astrocytoma             | LGG_PA_PF                  |
| PANEL_A_41 | MinION   | Rapid_CNS_A | Yes                        | Yes                                | diffuse glioma         | Glioblastoma (IDH wildtype)       | GBM RTK_II                 |
| PANEL_A_42 | MinION   | Rapid_CNS_A | Yes                        | Yes                                | diffuse glioma         | Glioblastoma (IDH wildtype)       | GBM RTK_II                 |
| PANEL_A_43 | MinION   | Rapid_CNS_A | Yes                        | Yes                                | diffuse glioma         | Glioblastoma (IDH wildtype)       | GBM RTK_II                 |
| PANEL_A_44 | MinION   | Rapid_CNS_A | Yes                        | Yes                                | diffuse glioma         | Glioblastoma (IDH wildtype)       | GBM RTK_II                 |
| PANEL_A_45 | MinION   | Rapid_CNS_A | Yes                        | Yes                                | diffuse glioma         | Glioblastoma (IDH wildtype)       | GBM RTK_II                 |
| PANEL_A_46 | MinION   | Rapid_CNS_A | No                         | No (prospective diagnostic sample) | diffuse glioma         | Glioblastoma (IDH wildtype)       | GBM RTK_II                 |
| PANEL_A_47 | MinION   | Rapid_CNS_A | No                         | No (prospective diagnostic sample) | diffuse glioma         | Glioblastoma (IDH wildtype)       | GBM MES                    |
| PANEL_B_01 | GridION  | Rapid_CNS_B | Yes                        | Yes                                | diffuse glioma         | Glioblastoma (IDH wildtype)       | GBM RTK_II                 |
| PANEL_B_02 | GridION  | Rapid_CNS_B | Yes                        | Yes                                | diffuse glioma         | Glioblastoma (IDH wildtype)       | GBM RTK_II                 |
| PANEL_B_03 | GridION  | Rapid_CNS_B | Yes                        | Yes                                | diffuse glioma         | Glioblastoma (IDH wildtype)       | GBM RTK_II                 |
| PANEL_B_04 | GridION  | Rapid_CNS_B | Yes                        | Yes                                | diffuse glioma         | Glioblastoma (IDH wildtype)       | GBM RTK_II                 |
| PANEL_B_05 | GridION  | Rapid_CNS_B | Yes                        | Yes                                | diffuse glioma         | Glioblastoma (IDH wildtype)       | GBM RTK_II                 |
| PANEL_B_06 | GridION  | Rapid_CNS_B | Yes                        | Yes                                | diffuse glioma         | Glioblastoma (IDH wildtype)       | GBM RTK_II                 |
| PANEL_B_07 | GridION  | Rapid_CNS_B | Yes                        | Yes                                | diffuse glioma         | Glioblastoma (IDH wildtype)       | GBM RTK_II                 |
| PANEL_B_08 | GridION  | Rapid_CNS_B | Yes                        | Yes                                | diffuse glioma         | Atypical teratoid, rhabdoid tumor | ATRT_SHH                   |
| PANEL_B_09 | GridION  | Rapid_CNS_B | No                         | No (prospective diagnostic sample) | diffuse glioma         | Oligodendroglioma (IDH mutant)    | O_IDH                      |
| PANEL_B_10 | GridION  | Rapid_CNS_B | No                         | No (prospective diagnostic sample) | diffuse glioma         | Glioblastoma (IDH wildtype)       | GBM RTK_II                 |
| PANEL_B_11 | GridION  | Rapid_CNS_B | No                         | No (prospective diagnostic sample) | diffuse glioma         | Glioblastoma (IDH wildtype)       | GBM RTK_II                 |
| PANEL_B_12 | GridION  | Rapid_CNS_B | No                         | No (prospective diagnostic sample) | diffuse glioma         | Glioblastoma (IDH wildtype)       | GBM RTK_II                 |

Suppl. Table 1: Overview of all samples in this study

| Library      | Number of features | Calibrated score (RF) | Predicted class (RF) | Calibrated confidence score (GLM) | Predicted class (GLM) | Predicted class (EPIC) | Concordance |
|--------------|--------------------|-----------------------|----------------------|-----------------------------------|-----------------------|------------------------|-------------|
| PANEL_A_01   | 10000              | 0.011159664           | GBM_MES              | 6.540558417                       | GBM_MES               | GBM_MES                | Sub-class   |
| PANEL_A_02   | 10000              | 0.996246535           | GBM_RTK_II           | 99.62465346                       | GBM_RTK_II            | GBM_RTK_II             | Sub-class   |
| PANEL_A_03   | 10000              | 0.999999998           | GBM_RTK_II           | 99.99999982                       | GBM_RTK_II            | GBM_RTK_I              | Family      |
| PANEL_A_04   | 10000              | 0.004540359           | GBM_MES              | 63.50232342                       | GBM_RTK_II            | GBM_RTK_I              | Family      |
| PANEL_A_05   | 10000              | 0.008446298           | GBM_RTK_I            | 94.63140789                       | GBM_RTK_II            | GBM_RTK_II             | Sub-class   |
| PANEL_A_06   | 10000              | 0.999999991           | GBM_RTK_II           | 99.99999908                       | GBM_RTK_II            | GBM_RTK_I              | Sub-class   |
| PANEL_A_07   | 10000              | 0.003829409           | GBM_MES              | 77.21341357                       | GBM_RTK_II            | GBM_RTK_II             | Sub-class   |
| PANEL_A_08   | 10000              | 0.997740399           | GBM_RTK_II           | 99.77403994                       | GBM_RTK_II            | GBM_MES                | Family      |
| PANEL_A_09   | 10000              | 0.907490998           | GBM_RTK_II           | 90.74909981                       | GBM_RTK_II            | GBM_RTK_II             | Sub-class   |
| PANEL_A_10   | 10000              | 0.000975314           | GBM_RTK_I            | 96.05291628                       | GBM_RTK_II            | GBM_RTK_I              | Family      |
| PANEL_A_11   | 10000              | 0.997461032           | GBM_RTK_I            | 99.74610323                       | GBM_RTK_I             | GBM_RTK_I              | Sub-class   |
| PANEL_A_12   | 10000              | 0.004372027           | GBM_MES              | 13.01771473                       | GBM_RTK_II            | GBM_RTK_II             | Sub-class   |
| PANEL_A_13   | 10000              | 0.000409539           | GBM_RTK_I            | 99.74301447                       | GBM_RTK_II            | GBM_RTK_I              | Family      |
| PANEL_A_14   | 10000              | 0.99039392            | GBM_RTK_II           | 99.039392                         | GBM_RTK_II            | GBM_RTK_II             | Sub-class   |
| PANEL_A_15   | 10000              | 0.914692029           | GBM_RTK_II           | 91.46920291                       | GBM_RTK_II            | GBM_RTK_II             | Sub-class   |
| PANEL_A_16   | 10000              | 0.542949575           | A_IDH_HG             | 54.29495747                       | A_IDH_HG              | A_IDH                  | Family      |
| PANEL_A_17   | 10000              | 0.995503384           | O_IDH                | 99.55033845                       | O_IDH                 | O_IDH                  | Sub-class   |
| PANEL_A_18   | 10000              | 0.999973347           | O_IDH                | 99.99733469                       | O_IDH                 | O_IDH                  | Sub-class   |
| PANEL_A_19   | 10000              | 0.524944644           | A_IDH_HG             | 52.4944644                        | A_IDH_HG              | A_IDH_HG               | Sub-class   |
| PANEL_A_20   | 10000              | 0.945875372           | A_IDH_HG             | 94.58753725                       | A_IDH_HG              | A_IDH_HG               | Sub-class   |
| PANEL_A_21   | 10000              | 0.999976579           | A_IDH                | 99.99765791                       | A_IDH                 | A_IDH                  | Sub-class   |
| PANEL_A_22   | 10000              | 0.999969496           | O_IDH                | 99.99694963                       | O_IDH                 | O_IDH                  | Sub-class   |
| PANEL_A_23   | 10000              | 0.884835069           | A_IDH_HG             | 88.48350689                       | A_IDH_HG              | A_IDH_HG               | Sub-class   |
| PANEL_A_24   | 10000              | 0.999135784           | A_IDH                | 99.9135784                        | A_IDH                 | A_IDH                  | Sub-class   |
| PANEL_A_25   | 10000              | 0.915488785           | A_IDH                | 91.54887846                       | A_IDH                 | A_IDH                  | Sub-class   |
| PANEL_A_26   | 10000              | 0.987204211           | O_IDH                | 98.72042108                       | O_IDH                 | O_IDH                  | Sub-class   |
| PANEL_A_27   | 10000              | 0.984714004           | A_IDH_HG             | 98.47140038                       | A_IDH_HG              | A_IDH_HG               | Sub-class   |
| PANEL_A_28   | 10000              | 0.999777797           | GBM_RTK_II           | 99.97777967                       | GBM_RTK_II            | GBM_RTK_II             | Sub-class   |
| PANEL_A_29   | 10000              | 0.001740446           | GBM_RTK_I            | 95.14750202                       | GBM_RTK_II            | GBM_RTK_I              | Family      |
| PANEL_A_30   | 10000              | 0.999999998           | GBM_RTK_II           | 99.99999983                       | GBM_RTK_II            | GBM_RTK_II             | Sub-class   |
| PANEL_A_31   | 10000              | 0.997517909           | O_IDH                | 99.75179086                       | O_IDH                 | O_IDH                  | Sub-class   |
| PANEL_A_32   | 10000              | 0.003847069           | GBM_RTK_I            | 99.61328256                       | GBM_RTK_II            | GBM_RTK_I              | Family      |
| PANEL_A_33   | 10000              | 0.997998384           | GBM_RTK_II           | 99.79983843                       | GBM_RTK_II            | GBM_RTK_II             | Sub-class   |
| PANEL_A_34   | 10000              | 0.247060925           | GBM_RTK_I            | 36.76086648                       | GBM_RTK_II            | GBM_RTK_I              | Family      |
| PANEL_A_35   | 10000              | 0.002270122           | GBM_MES              | 97.20798679                       | GBM_RTK_II            | GBM_RTK_II             | Sub-class   |
| PANEL_A_36   | 10000              | 0.999999997           | GBM_RTK_II           | 99.99999967                       | GBM_RTK_II            | GBM_RTK_II             | Sub-class   |
| PANEL_A_37   | 10000              | 0.982323764           | LGG_PA_PF            | 98.23237639                       | LGG_PA_PF             | LGG_PA_PF              | Sub-class   |
| PANEL_A_38   | 10000              | 0.662688227           | LGG_PA_MID           | 66.26882267                       | LGG_PA_MID            | LGG_PA_MID             | Sub-class   |
| PANEL_A_39   | 10000              | 0.994297964           | LGG_PA_PF            | 99.42979644                       | LGG_PA_PF             | LGG_PA_PF              | Sub-class   |
| PANEL_A_40   | 10000              | 0.929645857           | LGG_PA_PF            | 92.9645857                        | LGG_PA_PF             | LGG_PA_PF              | Sub-class   |
| PANEL_A_41   | 10000              | 0.999999994           | GBM_RTK_II           | 99.99999944                       | GBM_RTK_II            | GBM_RTK_II             | Sub-class   |
| PANEL_A_42   | 10000              | 0.001996373           | GBM_MES              | 94.7288772                        | GBM_RTK_II            | GBM_RTK_II             | Sub-class   |
| PANEL_A_43   | 10000              | 0.996190259           | GBM_RTK_II           | 99.61902589                       | GBM_RTK_II            | GBM_RTK_II             | Sub-class   |
| PANEL_A_44   | 10000              | 0.984196525           | GBM_RTK_II           | 98.41965254                       | GBM_RTK_II            | GBM_RTK_II             | Sub-class   |
| PANEL_A_45   | 10000              | 0.009189499           | GBM_MES              | 19.26935908                       | GBM_RTK_II            | GBM_RTK_II             | Sub-class   |
| PANEL_A_46   | 10000              | 0.99994905            | GBM_RTK_II           | 99.9949049                        | GBM_RTK_II            |                        |             |
| PANEL_A_47   | 10000              | 0.016392181           | GBM_MES              | 11.9140475                        | GBM_MES               |                        |             |
| PANEL_B_01   | 10000              | 0.008067548           | GBM_MES              | 7.596287338                       | GBM_RTK_II            | GBM_MES                | Family      |
| PANEL_B_02   | 10000              | 0.995937632           | GBM_RTK_II           | 99.59376318                       | GBM_RTK_II            | GBM_RTK_II             | Sub-class   |
| PANEL_B_03   | 10000              | 0.755716876           | GBM_RTK_II           | 75.57168763                       | GBM_RTK_II            | GBM_RTK_I              | Family      |
| PANEL_B_04   | 10000              | 0.999646153           | GBM_RTK_II           | 99.96461527                       | GBM_RTK_II            | GBM_RTK_II             | Sub-class   |
| PANEL_B_05   | 10000              | 0.032874718           | GBM_RTK_I            | 80.94821492                       | GBM_RTK_II            | GBM_MES                | Family      |
| PANEL_B_06   | 10000              | 0.999940639           | GBM_RTK_II           | 99.99406395                       | GBM_RTK_II            | GBM_RTK_II             | Sub-class   |
| PANEL_B_07   | 10000              | 0.004206767           | GBM_MES              | 9.747388487                       | GBM_RTK_II            | GBM_MES                | Family      |
| PANEL_B_08   | 10000              | 0.144500592           | ATRT_SHH             | 14.45005921                       | ATRT_SHH              | ATRT_SHH               | Sub-class   |
| PANEL_B_09   | 10000              | 0.952473286           | O_IDH                | 95.24732858                       | O_IDH                 |                        |             |
| PANEL_B_10   | 10000              | 0.001720594           | GBM_RTK_I            | 99.25069646                       | GBM_RTK_II            |                        |             |
| PANEL_B_11   | 10000              | 0.003673239           | GBM_RTK_I            | 16.16365579                       | GBM_RTK_II            |                        |             |
| PANEL_B_12   | 10000              | 0.023254435           | GBM_RTK_I            | 74.71735342                       | GBM_RTK_II            |                        |             |
| PANEL_B_01_1 | 10000              | 0.006593588           | GBM_MES              | 11.52569581                       | GBM_RTK_II            | GBM_MES                | Family      |
| PANEL_B_01_2 | 10000              | 0.006453965           | GBM_MES              | 5.921099306                       | GBM_RTK_II            | GBM_MES                | Family      |
| PANEL_B_02_1 | 10000              | 0.003143455           | GBM_RTK_I            | 72.39732753                       | GBM_RTK_II            | GBM_RTK_II             | Sub-class   |
| PANEL_B_02_2 | 10000              | 0.986512444           | GBM_RTK_II           | 98.65124435                       | GBM_RTK_II            | GBM_RTK_II             | Sub-class   |
| PANEL_B_03_1 | 10000              | 0.002986742           | GBM_RTK_I            | 73.68474891                       | GBM_RTK_II            | GBM_RTK_I              | Family      |
| PANEL_B_03_2 | 10000              | 0.002766173           | GBM_RTK_I            | 49.69252738                       | GBM_RTK_II            | GBM_RTK_I              | Family      |
| PANEL_B_05_1 | 10000              | 0.079277925           | GBM_RTK_I            | 41.81810666                       | GBM_RTK_II            | GBM_MES                | Family      |
| PANEL_B_05_2 | 10000              | 0.098051325           | GBM_RTK_I            | 9.805132547                       | GBM_RTK_I             | GBM_MES                | Family      |
| PANEL_B_06_1 | 10000              | 0.999285339           | GBM_RTK_II           | 99.92853386                       | GBM_RTK_II            | GBM_RTK_II             | Sub-class   |
| PANEL_B_06_2 | 10000              | 0.999803912           | GBM_RTK_II           | 99.98039121                       | GBM_RTK_II            | GBM_RTK_II             | Sub-class   |

Suppl. Table 2. Methylation classification results and concordance with EPIC array

| Library      | Average  | Prediction probability | Predicted      | Truth        |
|--------------|----------|------------------------|----------------|--------------|
| PANEL_A_01   | 14,23577 |                        | 0 Unmethylated | Unmethylated |
| PANEL_A_02   | 17,76058 |                        | 0 Unmethylated | Unmethylated |
| PANEL_A_03   | 24,27226 |                        | 0 Unmethylated | Unmethylated |
| PANEL_A_04   | 11,78686 |                        | 0 Unmethylated | Unmethylated |
| PANEL_A_05   | 11,25839 |                        | 0 Unmethylated | Unmethylated |
| PANEL_A_06   | 4,353285 |                        | 0 Unmethylated | Unmethylated |
| PANEL_A_07   | 10,18175 |                        | 0 Unmethylated | Unmethylated |
| PANEL_A_08   | 12,26058 |                        | 0 Unmethylated | Unmethylated |
| PANEL_A_09   | 8,331387 |                        | 0 Unmethylated | Unmethylated |
| PANEL_A_10   | 10,03431 |                        | 0 Unmethylated | Unmethylated |
| PANEL_A_11   | 13,38394 |                        | 0 Unmethylated | Unmethylated |
| PANEL_A_12   | 17,20438 |                        | 0 Unmethylated | Unmethylated |
| PANEL_A_13   | 11,04672 |                        | 0 Unmethylated | Unmethylated |
| PANEL_A_14   | 11,24964 |                        | 0 Unmethylated | Unmethylated |
| PANEL_A_15   | 12,46715 |                        | 0 Unmethylated | Unmethylated |
| PANEL_A_16   | 46,67372 |                        | 1 Methylated   | Methylated   |
| PANEL_A_17   | 65,74599 |                        | 1 Methylated   | Methylated   |
| PANEL_A_18   | 54,38832 |                        | 1 Methylated   | Methylated   |
| PANEL_A_19   | 40,55985 |                        | 1 Methylated   | Methylated   |
| PANEL_A_20   | 17,57455 |                        | 0 Unmethylated | Unmethylated |
| PANEL_A_21   | 29,44161 | 0,999999999            | Methylated     | Methylated   |
| PANEL_A_22   | 56,83504 |                        | 1 Methylated   | Methylated   |
| PANEL_A_23   | 48,49781 |                        | 1 Methylated   | Methylated   |
| PANEL_A_24   | 37,72044 |                        | 1 Methylated   | Methylated   |
| PANEL_A_25   | 43,43066 |                        | 1 Methylated   | Methylated   |
| PANEL_A_26   | 40,71825 |                        | 1 Methylated   | Methylated   |
| PANEL_A_27   | 31,57372 |                        | 1 Methylated   | Methylated   |
| PANEL_A_28   | 17,96563 |                        | 0 Unmethylated | Unmethylated |
| PANEL_A_29   | 18,47518 |                        | 0 Unmethylated | Unmethylated |
| PANEL_A_30   | 44,16204 |                        | 1 Methylated   | Methylated   |
| PANEL_A_31   | 39,70876 |                        | 1 Methylated   | Methylated   |
| PANEL_A_32   | 57,55328 |                        | 1 Methylated   | Methylated   |
| PANEL_A_33   | 18,96552 |                        | 0 Unmethylated | Unmethylated |
| PANEL_A_34   | 17,48175 |                        | 0 Unmethylated | Unmethylated |
| PANEL_A_35   | 13,56204 |                        | 0 Unmethylated | Unmethylated |
| PANEL_A_36   | 74,94161 |                        | 1 Methylated   | Methylated   |
| PANEL_A_37   | 21,08321 |                        | 0 Unmethylated | Unmethylated |
| PANEL_A_38   | 11,84307 |                        | 0 Unmethylated | Unmethylated |
| PANEL_A_39   | 15,47445 |                        | 0 Unmethylated | Unmethylated |
| PANEL_A_40   | 10,59124 |                        | 0 Unmethylated | Unmethylated |
| PANEL_A_41   | 8,029197 |                        | 0 Unmethylated | Unmethylated |
| PANEL_A_42   | 6,334307 |                        | 0 Unmethylated | Unmethylated |
| PANEL_A_43   | 9,086861 |                        | 0 Unmethylated | Unmethylated |
| PANEL_A_44   | 20,80146 |                        | 0 Unmethylated | Unmethylated |
| PANEL_A_45   | 60,65182 |                        | 1 Methylated   | Methylated   |
| PANEL_A_46   | 8,710219 |                        | 0 Unmethylated | Unmethylated |
| PANEL_A_47   | 13,4708  |                        | 0 Unmethylated | Unmethylated |
| PANEL_B_01   | 10,25182 |                        | 0 Unmethylated | Unmethylated |
| PANEL_B_02   | 10,02701 |                        | 0 Unmethylated | Unmethylated |
| PANEL_B_03   | 44,91679 |                        | 1 Methylated   | Methylated   |
| PANEL_B_04   | 68,0927  |                        | 1 Methylated   | Methylated   |
| PANEL_B_05   | 6,678102 |                        | 0 Unmethylated | Unmethylated |
| PANEL_B_06   | 13,74234 |                        | 0 Unmethylated | Unmethylated |
| PANEL_B_07   | 15,85766 |                        | 0 Unmethylated | Unmethylated |
| PANEL_B_08   | 14,8438  |                        | 0 Unmethylated | Unmethylated |
| PANEL_B_09   | 76,51168 |                        | 1 Methylated   | Methylated   |
| PANEL_B_10   | 77,8927  |                        | 1 Methylated   | Methylated   |
| PANEL_B_11   | 40,00219 |                        | 1 Methylated   | Methylated   |
| PANEL_B_12   | 12,72482 |                        | 0 Unmethylated | Unmethylated |
|              |          |                        |                |              |
| PANEL_B_01_1 | 5,644526 |                        | 0 Unmethylated | Unmethylated |
| PANEL_B_01_2 | 11,49927 |                        | 0 Unmethylated | Unmethylated |
| PANEL_B_02_1 | 11,24161 |                        | 0 Unmethylated | Unmethylated |
| PANEL_B_02_2 | 9,162774 |                        | 0 Unmethylated | Unmethylated |
| PANEL_B_03_1 | 32,23723 |                        | 1 Methylated   | Methylated   |
| PANEL_B_03_2 | 60,56058 |                        | 1 Methylated   | Methylated   |
| PANEL_B_05_1 | 6,081022 |                        | 0 Unmethylated | Unmethylated |
| PANEL_B_05_2 | 8,029197 |                        | 0 Unmethylated | Unmethylated |
| PANEL_B_06_1 | 10,82523 |                        | 0 Unmethylated | Unmethylated |
| PANEL_B_06_2 | 16,95693 |                        | 0 Unmethylated | Unmethylated |

Suppl. Table 3. MGMT promoter status assessment. Average indicates mean over 137 selected CpG sites, truth is inferred from EPIC array analysis or pyrosequencing

| Sample     | Panel       | Platform | IDH1 | TERTp | MGMT         | Methylation_classification | 1p loss | 19q loss | 7 gain | 10 loss | EGFR amplification | CDKN2A/B deletion |
|------------|-------------|----------|------|-------|--------------|----------------------------|---------|----------|--------|---------|--------------------|-------------------|
| PANEL_B_09 | Rapid_CNS_B | GridION  | Yes  | Yes   | Methylated   | O_IDH                      | Yes     | Yes      | No     | No      | No                 | Yes               |
| PANEL_B_10 | Rapid_CNS_B | GridION  | No   | Yes   | Methylated   | GBM_RTK_II                 | No      | No       | Yes    | No      | Yes                | Yes               |
| PANEL_B_11 | Rapid_CNS_B | GridION  | No   | No    | Methylated   | GBM_RTK_II                 | No      | No       | Yes    | Yes     | Yes                | No                |
| PANEL_B_12 | Rapid_CNS_B | GridION  | No   | Yes   | Unmethylated | GBM_RTK_II                 | No      | No       | Yes    | Yes     | Yes                | Yes               |
| PANEL_A_47 | Rapid_CNS_A | MinION   | No   | Yes   | Unmethylated | GBM_RTK_II                 | No      | No       | Yes    | Yes     | Yes                | No                |
| PANEL_B_48 | Rapid_CNS_A | MinION   | No   | Yes   | Unmethylated | GBM_MES                    | No      | No       | Yes    | Yes     | Yes                | No                |

Suppl. Table 4. Pathognomonic alterations for new diagnostic samples

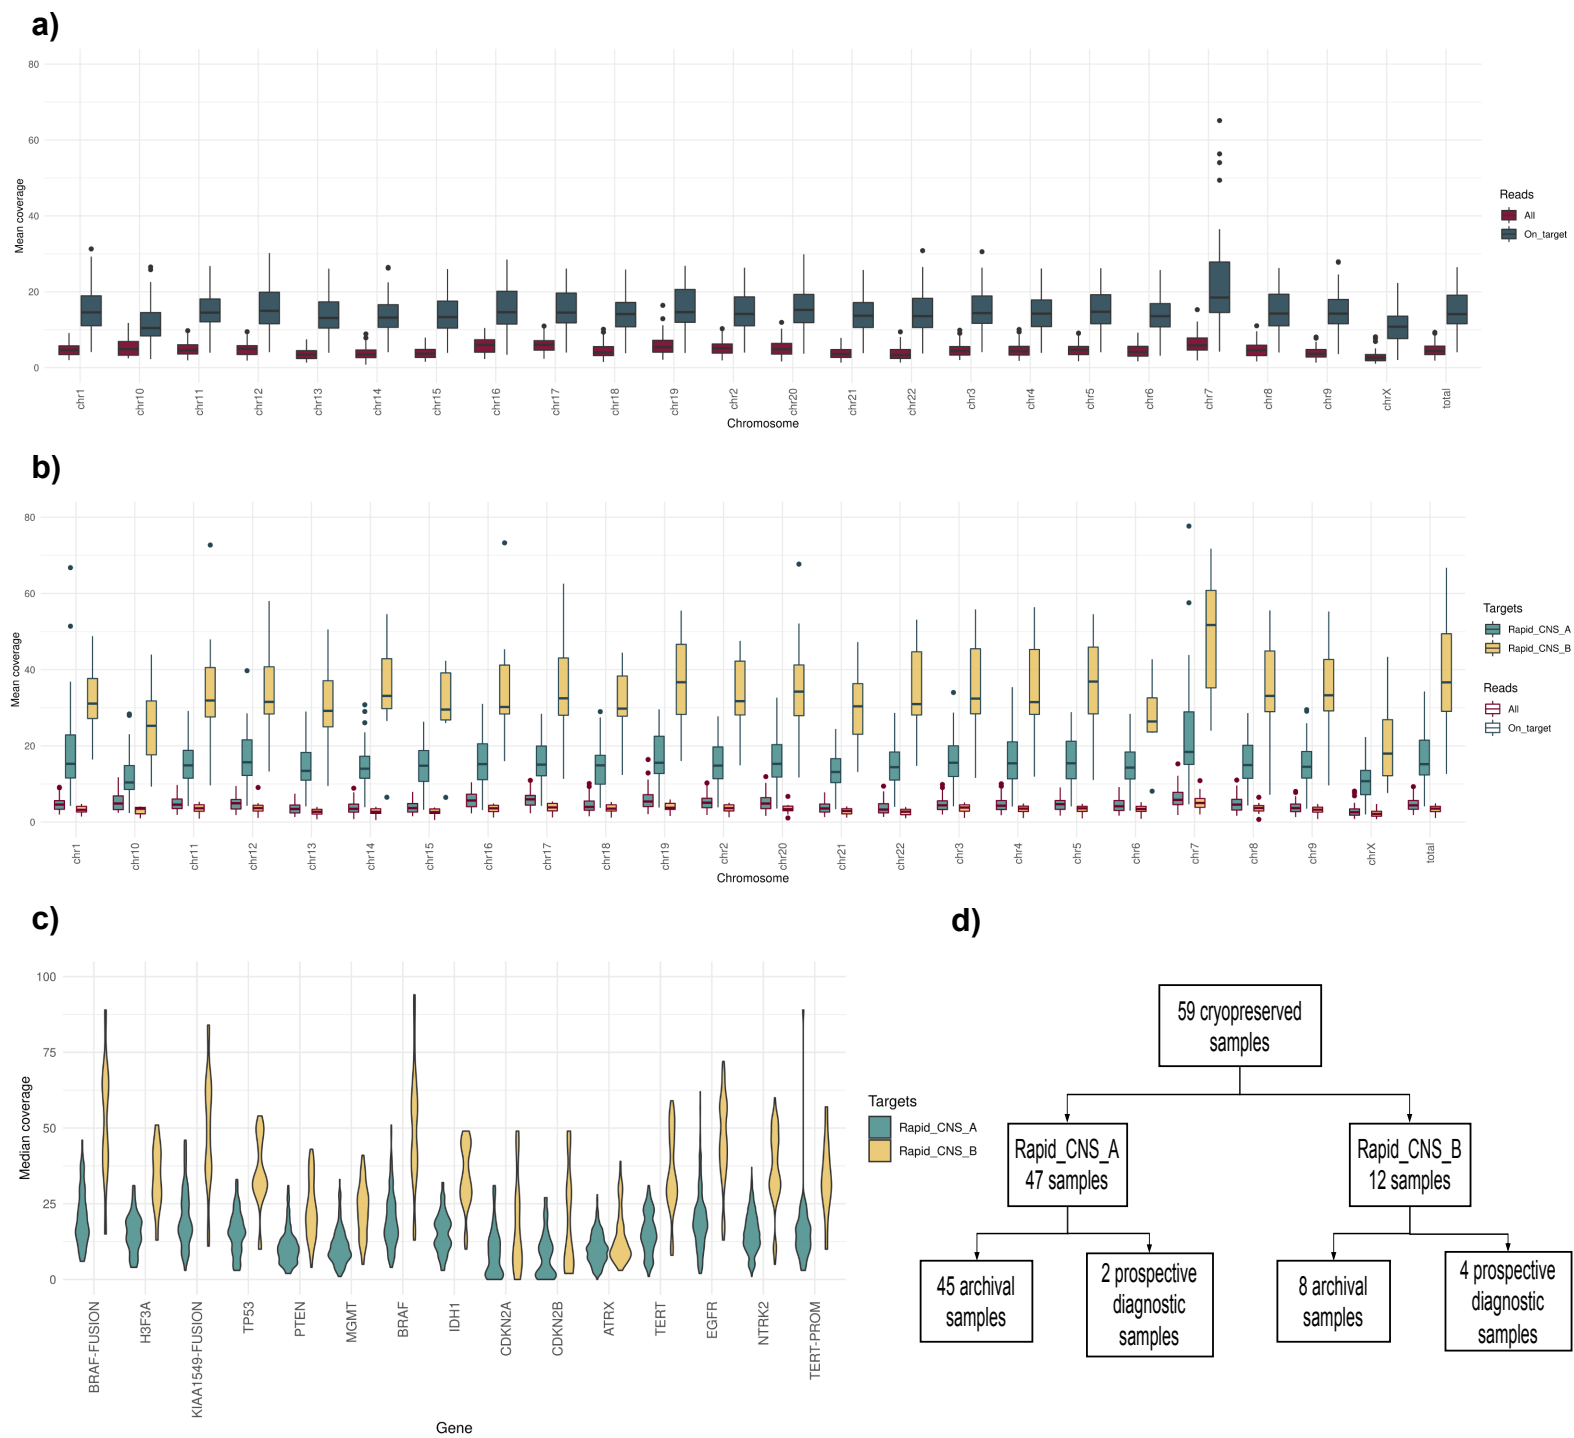

**Suppl. Fig 1.** a) Mean on-target coverage for 47 samples (PANEL\_A\_01- PANEL\_A\_47) sequenced using Rapid\_CNS\_A. b) Mean on-target coverage for samples sequenced using Rapid\_CNS\_A vs samples sequenced using Rapid\_CNS\_B. c) Median coverage over key pathognomonic alterations compared between samples sequenced using Rapid\_CNS\_A and Rapid\_CNS\_B. d) Overview of samples.

PANEL\_A\_02

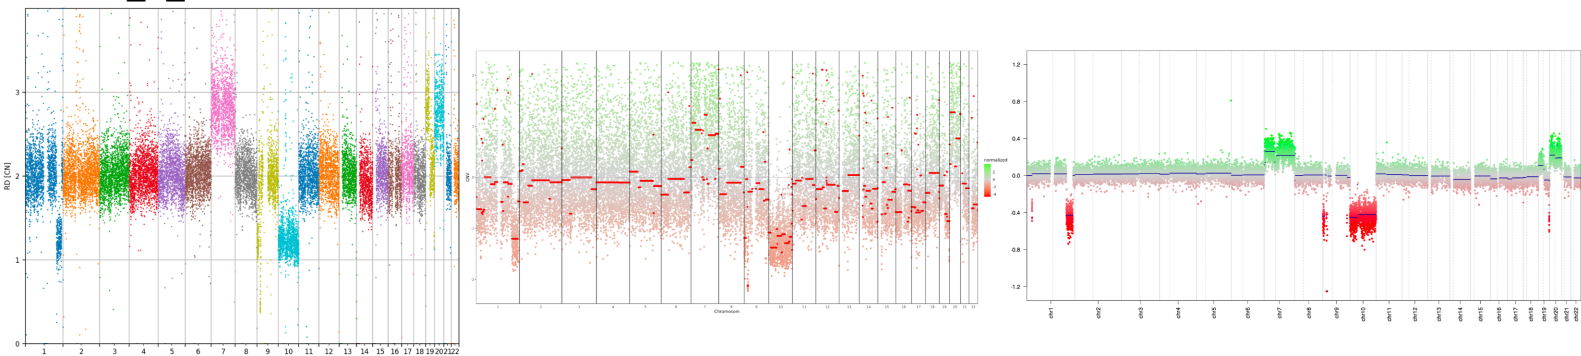

PANEL\_A\_10

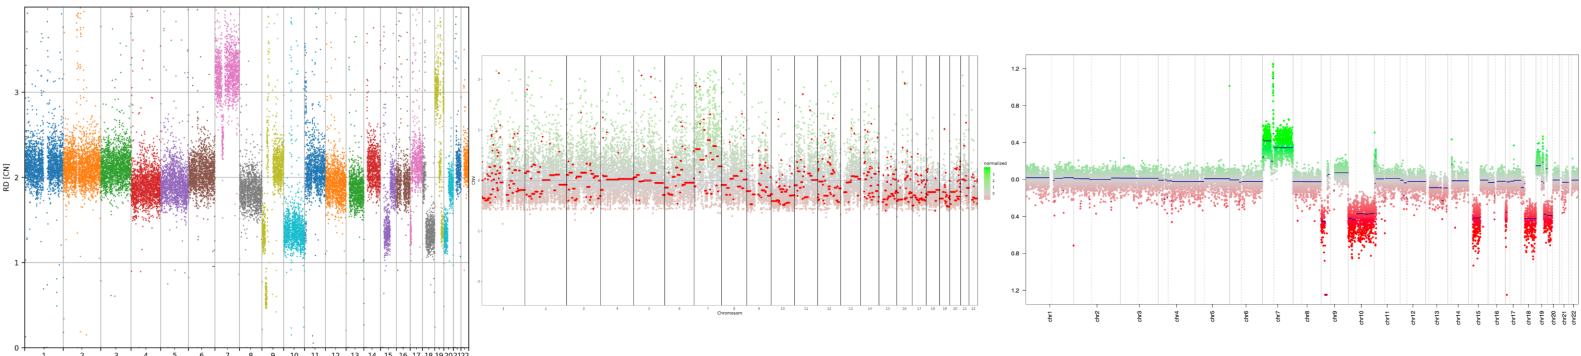

PANEL\_A\_18

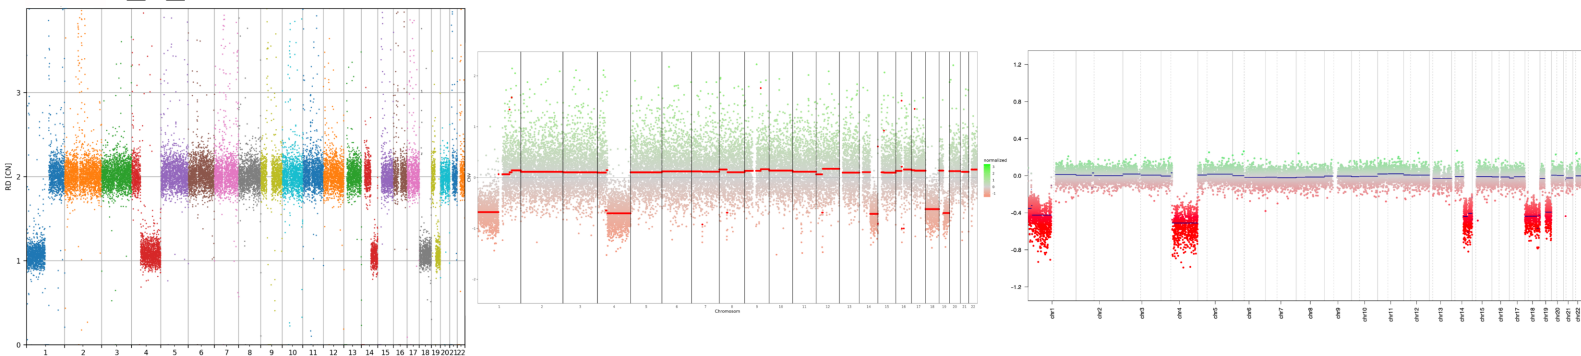

PANEL\_A\_20

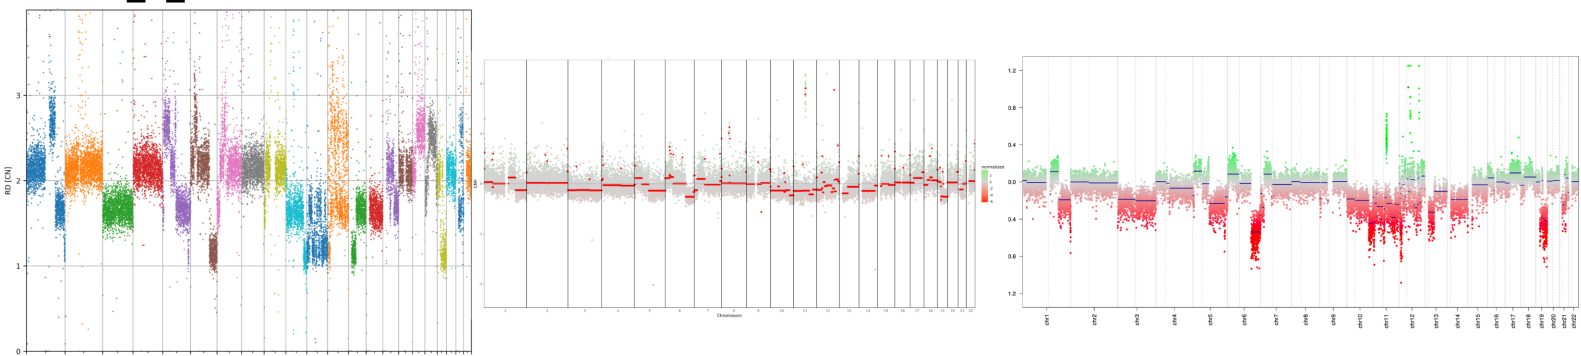

PANEL\_B\_07

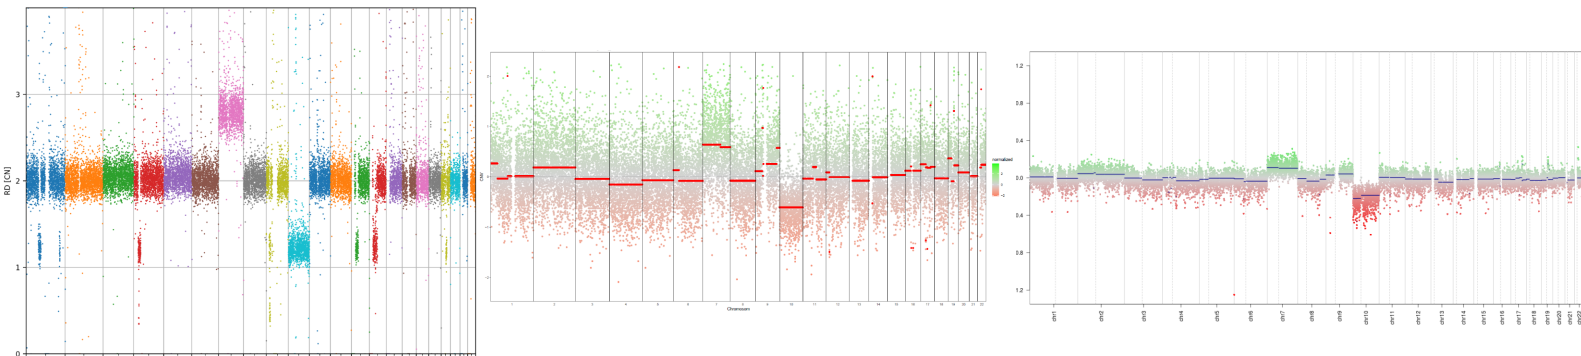

Suppl. Fig. 2 Copy number profiles using Rapid-CNS2 (left), NGS panel sequencing (center), EPIC array analysis (right).

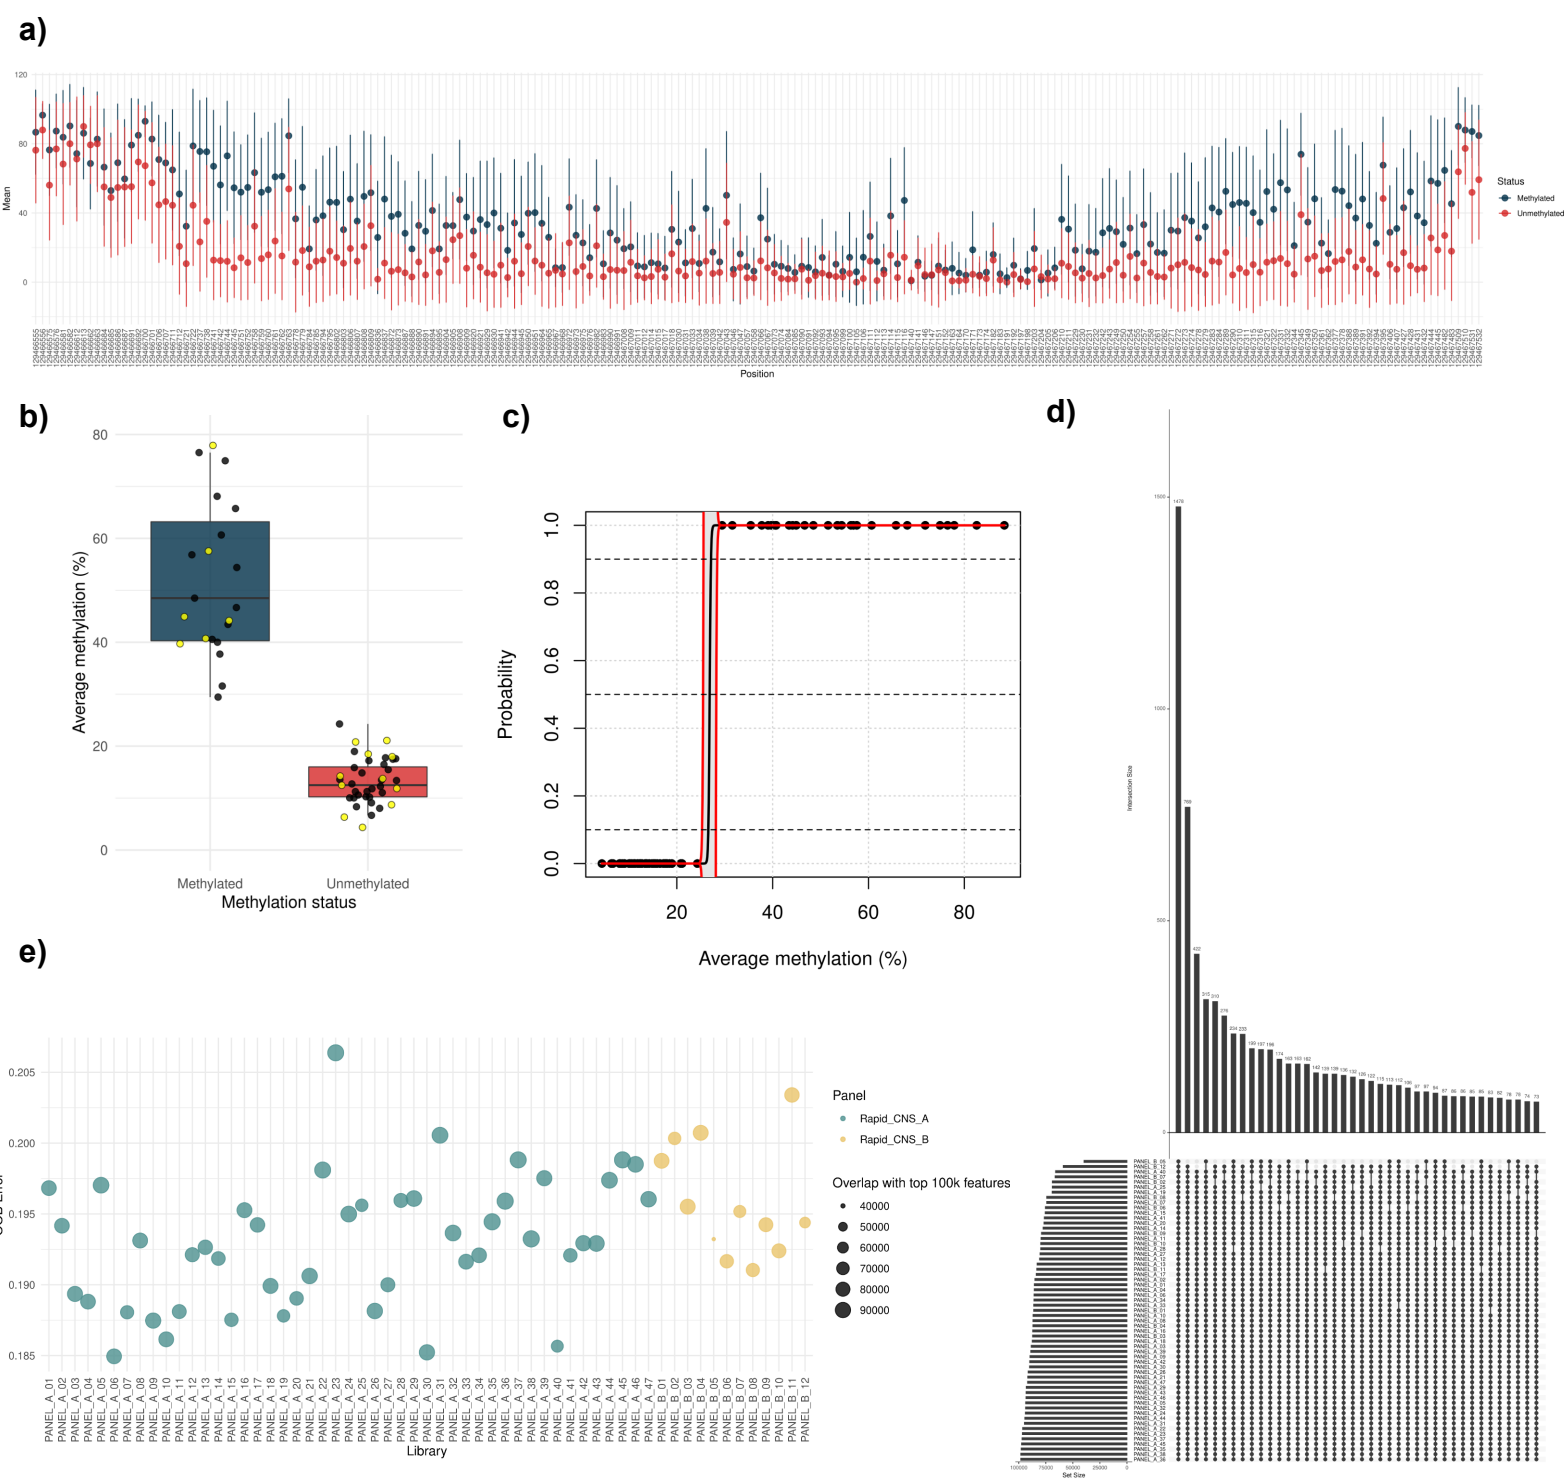

**Suppl. Fig. 3** a) Mean methylation over each CpG site in samples with methylated (blue) and unmethylated (red) MGMT promoter regions as reported by EPIC array analysis or pyrosequencing, bars indicate standard deviation. b) Average methylation over 137 filtered CpG sites in methylated and unmethylated cases (training set). Yellow points indicate test samples. c) Probabilities for classification using the proposed logistic regression-based prediction model for MGMT promoter status (0 for unmethylated and 1 for methylated). Gray band indicates the 95% point-wise confidence interval. The averages over 137 CpG sites for methylated and unmethylated samples are shown along  $y=1$  and  $y=0$  respectively. d) Intersection of CpG sites between the 10,000 CpG sites used for training the ad-hoc random forest classifier for each sample. e) Out-of-the-bag error of the ad-hoc random forest classifier trained for each sample. Color indicates whether sample was sequenced using Rapid\_CNS\_A or Rapid\_CNS\_B for 72h.

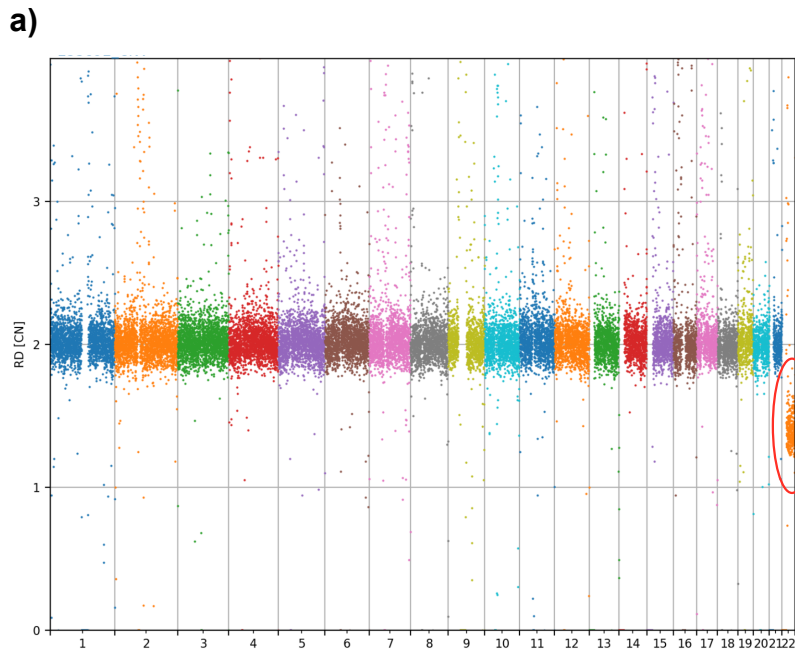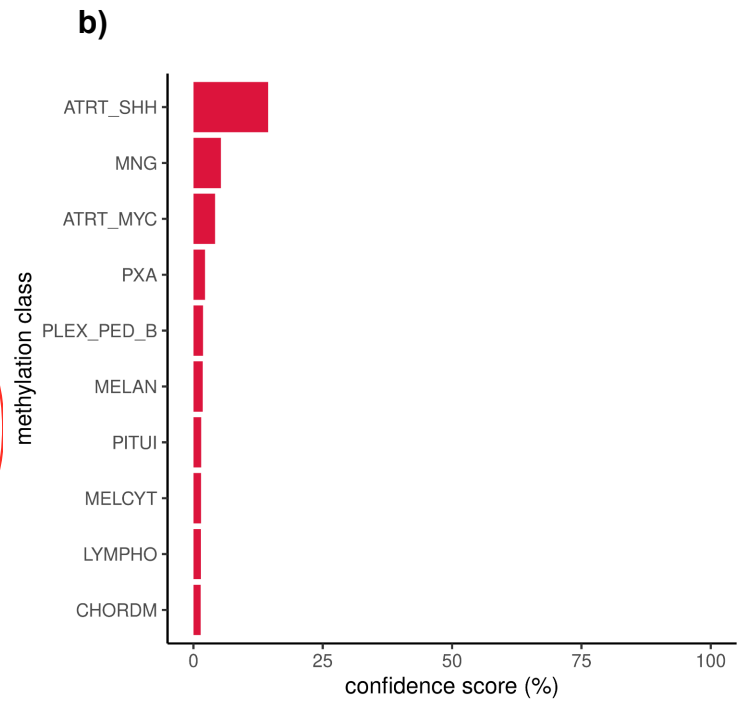

**Suppl. Fig. 4** a) Copy number profile (with chr22q deletion highlighted) and b) confidence score for methylation classification for PANEL\_B\_08.



# FOR RESEARCH USE ONLY

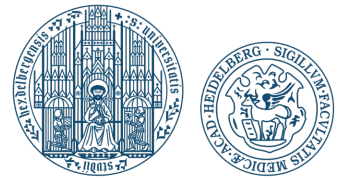

**HEIDELBERG**  
UNIVERSITY  
HOSPITAL

**Patient name:** XXXXXX

**Sample ID:** PANEL\_B\_07

**Submitted on:** XX.XX.XXXX

**Reported on:** XX.XX.XXXX

**Panel:** Rapid-CNS<sup>2</sup> (Rapid\_CNS\_B)

\*This report was generated by Rapid-CNS<sup>2</sup> and is intended for research use only. Frozen tumour tissue was prepared and processed using the SQK-LSK110 Ligation Sequencing Kit from Oxford Nanopore Technologies. 160 gene regions from the NPHD panel were targeted using an adaptive sampling approach on the GridION. Data was analysed by the custom Rapid-CNS<sup>2</sup> pipeline. Comprehensive analysis of CNS tumours using Rapid-CNS<sup>2</sup> is a research tool currently under development. It has not been clinically validated in sufficiently large cohorts. Interpretation and implementation of the results in a clinical setting is in the sole responsibility of the treating physician.

## Mutations:

| Chr   | Start     | End       | Ref | Alt          | Func     | Gene  | ExonicFunc             | cytoBand | avsnp147    | X1000g2015<br>aug_eur | cosmic68                       |
|-------|-----------|-----------|-----|--------------|----------|-------|------------------------|----------|-------------|-----------------------|--------------------------------|
| chr5  | 1295228   | 1295228   | G   | A            | upstream | TERT  | .                      | 5p15.33  | .           | .                     | .                              |
| chr10 | 89692826  | 89692826  | T   | -            | exonic   | PTEN  | frameshift<br>deletion | 10q23.31 | .           | .                     | ID=COSM1349503                 |
| chr10 | 89692839  | 89692839  | T   | G            | exonic   | PTEN  | nonsynonymous<br>SNV   | 10q23.31 | .           | .                     | ID=COSM13135                   |
| chr12 | 57499094  | 57499094  | G   | -            | exonic   | STAT6 | frameshift<br>deletion | 12q13.3  | .           | .                     | ID=COSM1363223                 |
| chr12 | 121434630 | 121434630 | -   | TCATT<br>CAT | intronic | HNF1A | .                      | 12q24.31 | rs397707647 | .                     | ID=COSM1645167                 |
| chr9  | 87459812  | 87459812  | A   | -            | intronic | NTRK2 | .                      | 9q21.33  | rs373383833 | 0.001                 | .                              |
| chr16 | 4987050   | 4987050   | G   | T            | UTR5     | PPL   | .                      | 16p13.3  | rs376539573 | 0.001                 | .                              |
| chr17 | 29557466  | 29557466  | A   | G            | intronic | NF1   | .                      | 17q11.2  | rs535609733 | 0.001                 | .                              |
| chr12 | 69229771  | 69229771  | T   | -            | intronic | MDM2  | .                      | 12q15    | rs533467429 | 0.002                 | ID=COSM1639229<br>.COSM1639228 |
| chr2  | 46611853  | 46611853  | C   | T            | UTR3     | EPAS1 | .                      | 2p21     | rs142847751 | 0.003                 | .                              |

## Pathology evaluation:

Glioblastoma

### MGMT promoter:

MGMT promoter methylation status is assessed using a logistic regression based prediction model

Status = **Unmethylated**

Probability = 1.00000

Average = 12.72%

(recommended cut-off is 25%)

## Copy number profile:

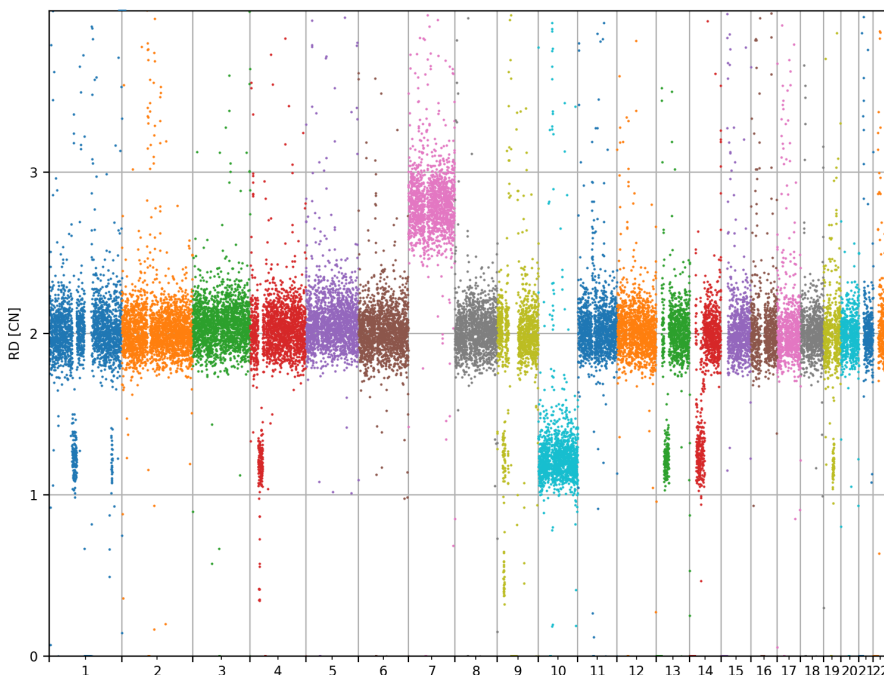

## Methylation classification:

Methylation-based classification is based on 58,856 CpG sites. The Brier score of this ad-hoc classifier is 19.3%. Using this classifier, the sample has been classified as **glioblastoma, IDH wildtype, subclass RTK II**. This prediction has a confidence score of 76.2%. The calibrated score distribution for the Top 10 entities is given below.

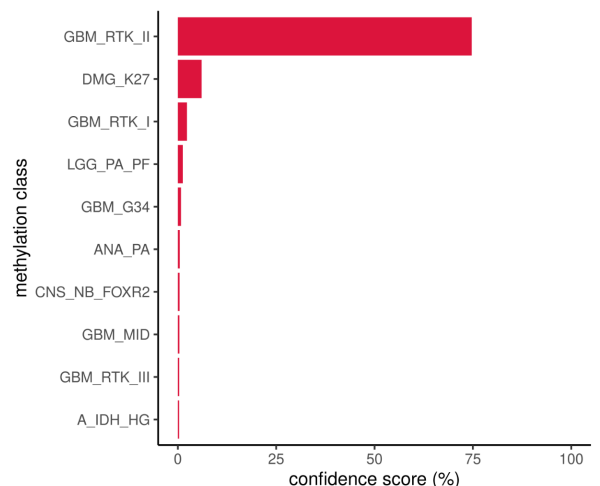

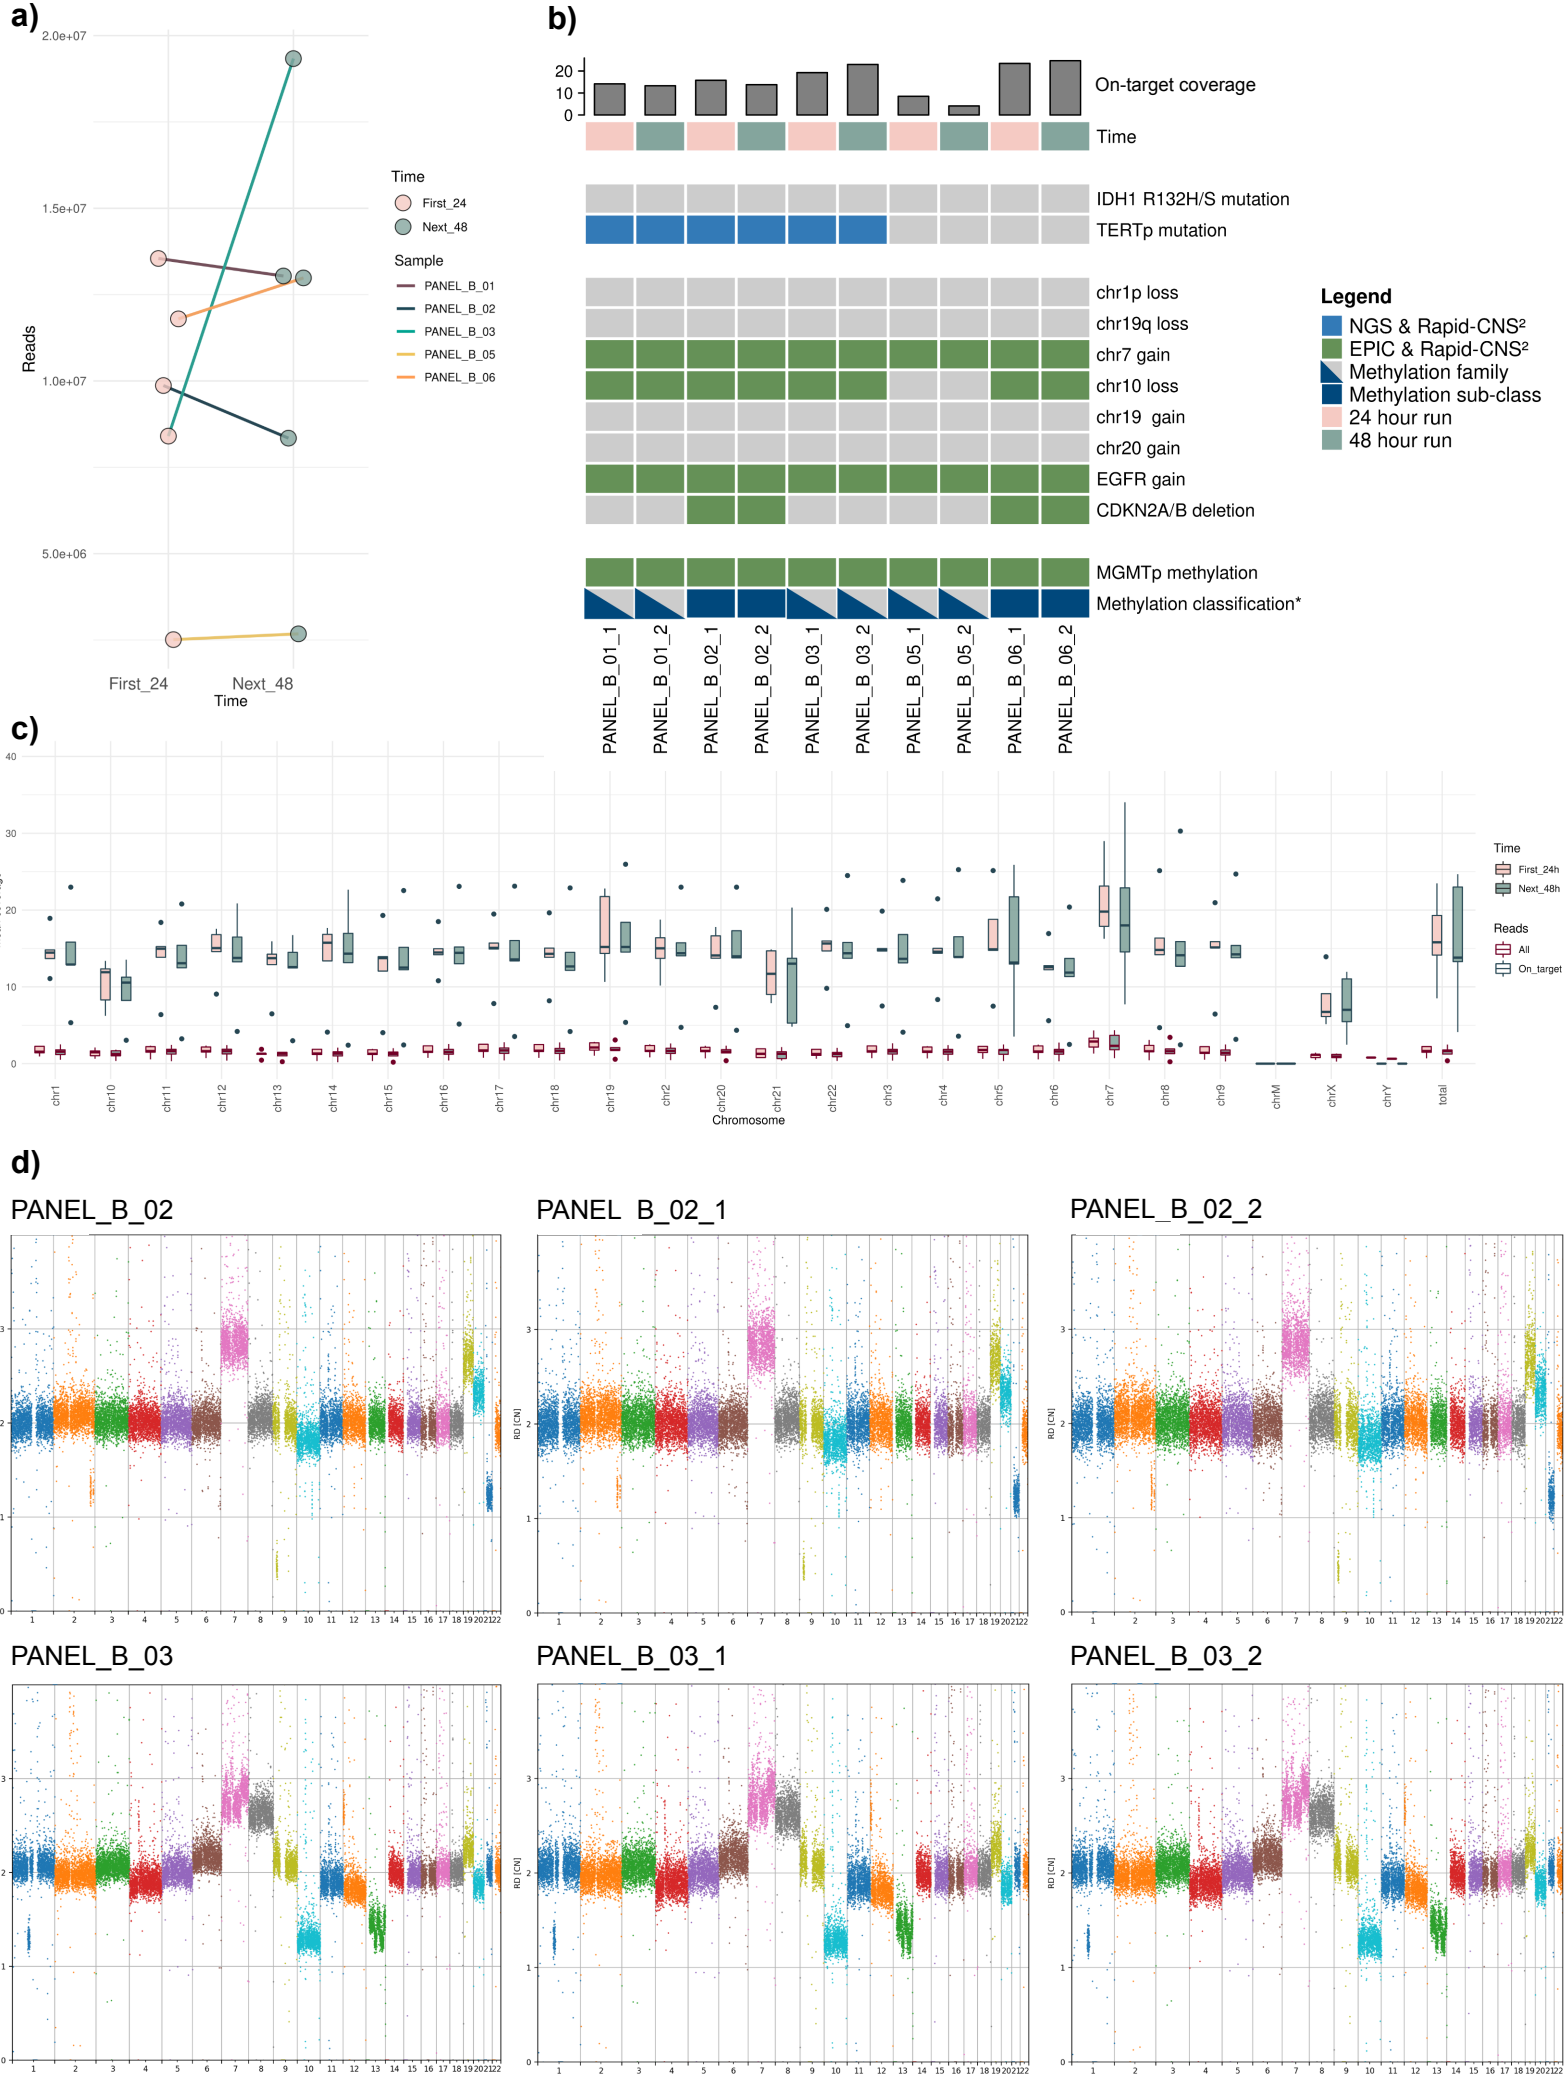

**Suppl. Fig. 6** a) Number of reads generated per sample (PANEL\_B\_01,02,03,05,06) over the first 24h run (left) and next 48h run after flushing and reloading (right). b) Concordance of clinically relevant alterations & classification for samples over the first 24h run (PANEL\_X\_1) and subsequent 48h run (PANEL\_X\_2). Annotations same as Fig. 1 d. c) Mean coverage over on target regions vs all regions per chromosome for the first 24h run and next 48h runs. d) Copy number profiles for the 72h run (left), first 24h run (middle) and next 48h run (right).

## PANEL\_A\_22

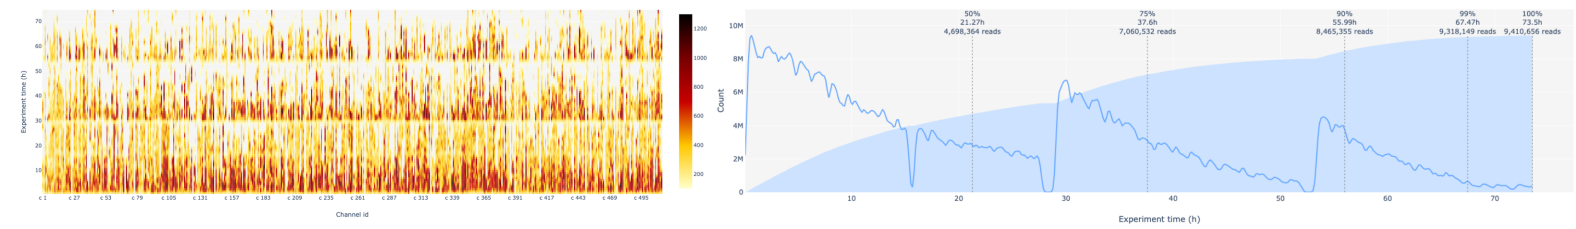

## PANEL\_A\_48

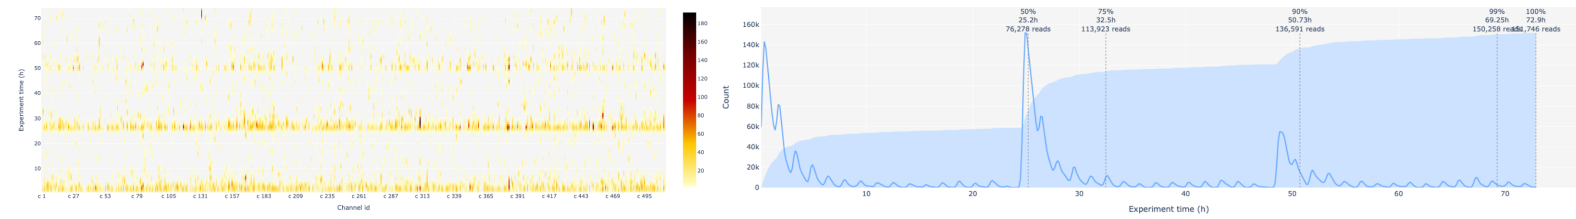

## PANEL\_A\_49\_1

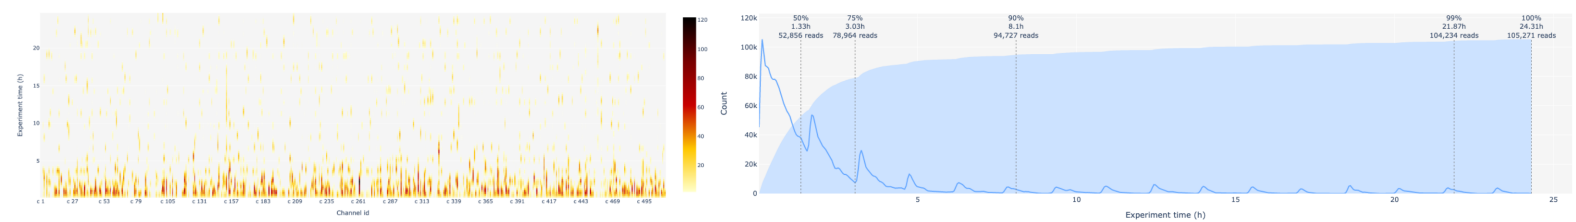

## PANEL\_A\_49\_2

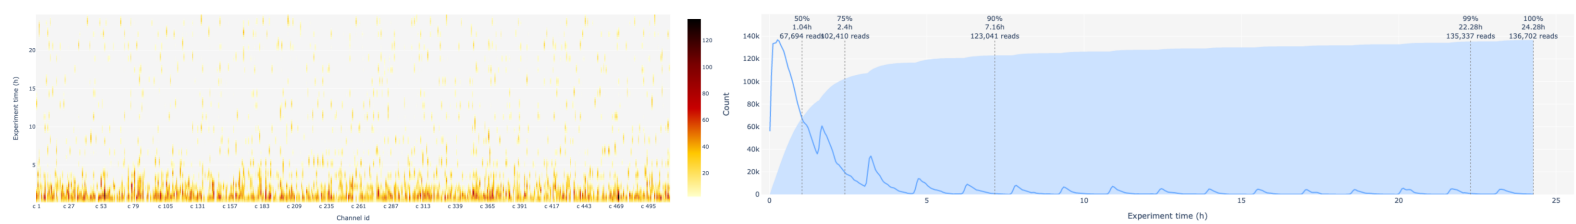

**Suppl. Fig. 7** FFPE samples. Channel activity (left) and cumulative read counts over time (right) for a cryopreserved sample (PANEL\_A\_22) compared to FFPE samples- PANEL\_A\_48 (72h), PANEL\_A\_49\_1 and PANEL\_A\_49\_2 (24h).
